# Supplementary material for: Tuberculosis alters immune-metabolic pathways resulting in perturbed IL-1 responses
Source: bioRxiv or medRxiv preprint supplement (doi:10.1101/2020.12.17.423082), 2020-12-17

# Supplementary Figure 1

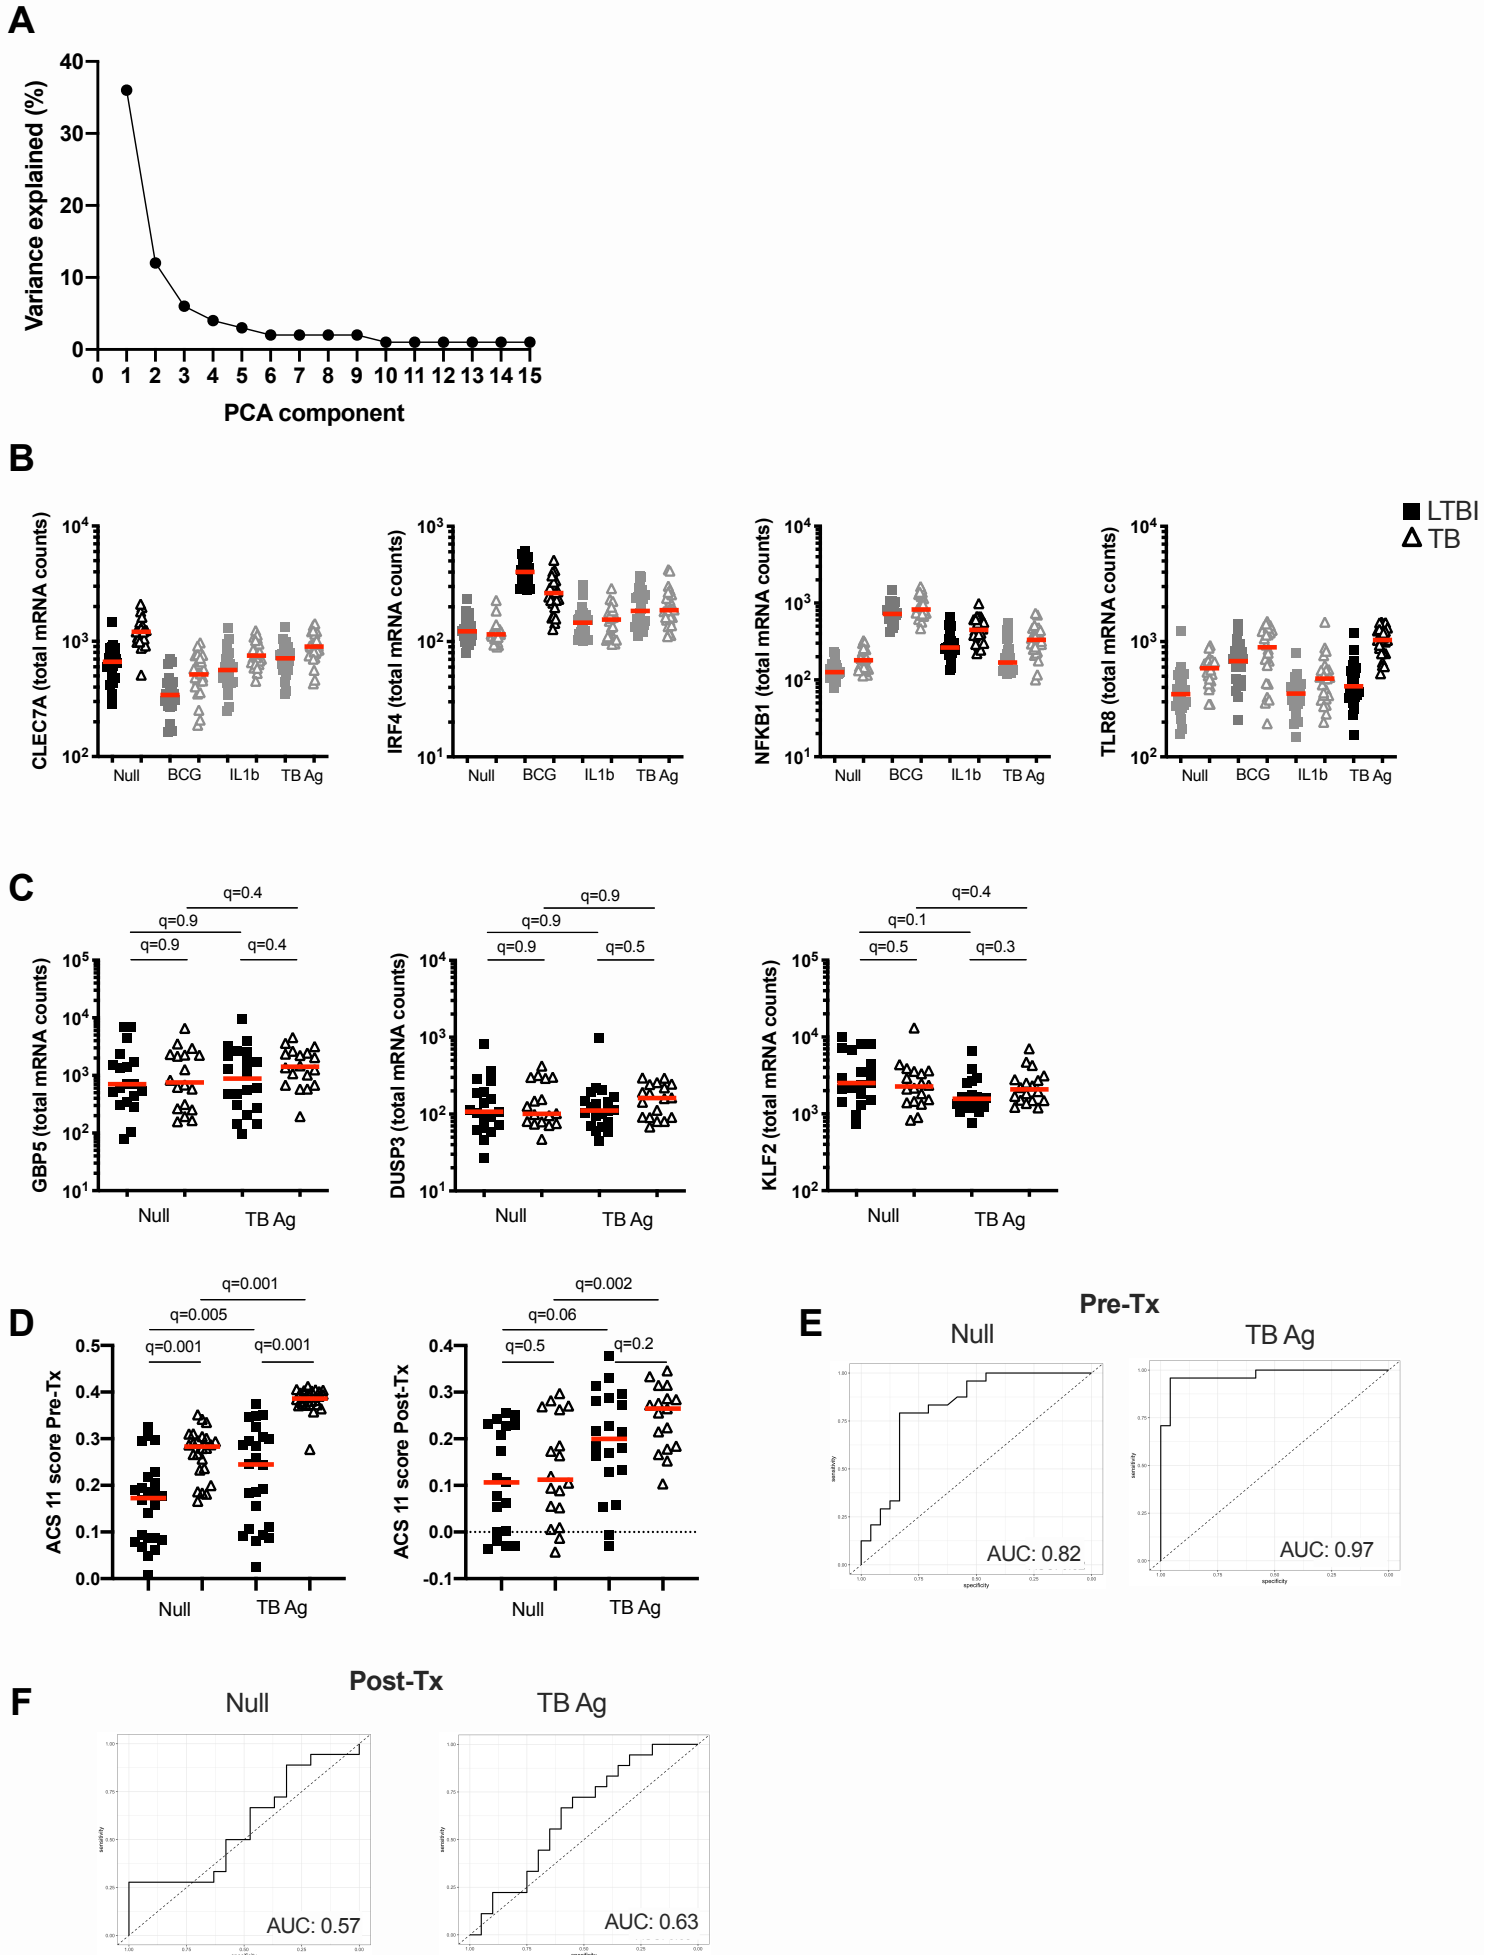

# Supplementary Figure 2

**A**

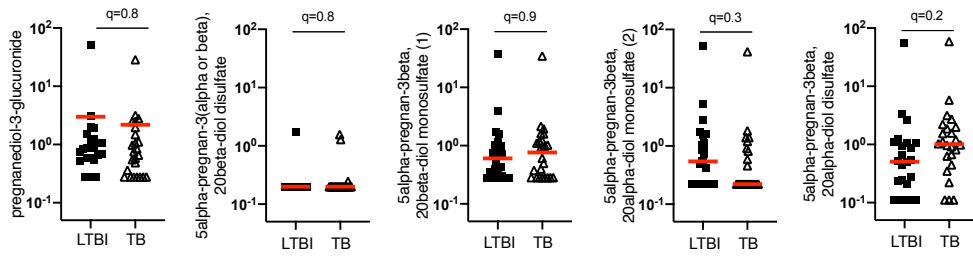

**B**

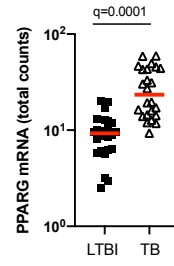

**C**

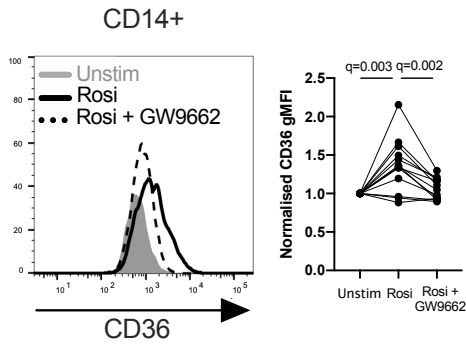

**D**

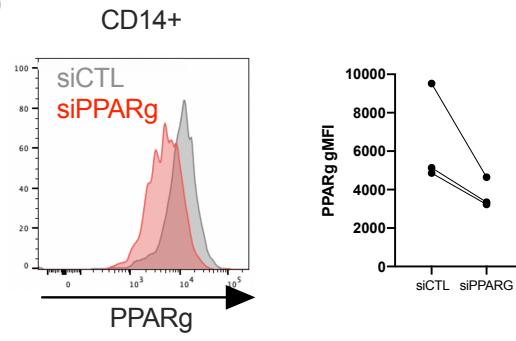

Supplement: Supplementary file [file media-1.pdf]
