# Supplementary material for: Tuberculosis alters immune-metabolic pathways resulting in perturbed IL-1 responses
Source: bioRxiv or medRxiv preprint supplement (doi:10.1101/2020.12.17.423082), 2020-12-17
Supplement: Supplementary file [file media-2.pdf]

|                                   | TB Patients          | LTBI controls | p value |
|-----------------------------------|----------------------|---------------|---------|
| Age (median years, IQR)           | 33 (25-40)           | 33 (24-41)    | 0.89    |
| Sex (% female)                    | 24                   | 24            | >0.99   |
| Ethnicity (% Cape Mixed ancestry) | 72                   | 76            | >0.99   |
| Household TB contacts (%yes)      | 56                   | 40            | 0.26    |
| BMI (media, IQR)                  | 20 (19-21)           | 26 (24-28)    | <0.0001 |
| Smoking (n)                       | Smoker               | 14            | 0.07    |
|                                   | Ex-smoker            | 7             |         |
|                                   | Non-smoker           | 4             |         |
| Visit 1 (n° donors)               | 24                   | 24            | NA      |
| Visit 2 (n° donors)               | 18 (after treatment) | 19            | NA      |

**Table 1.** Tuberculosis cohort characteristics. TB: tuberculosis; LTBI: Latent tuberculosis infection; IQR: Interquartile range; NA: Non applicable.

|            |
|------------|
| Plus genes |
| ACTA2      |
| ALDH1A1    |
| ANKRD22    |
| APOL1      |
| APOL6      |
| BATF2      |
| KLF2       |
| CALML4     |
| CASP4      |
| CREB5      |
| CYB561     |
| DEFA1      |
| DUSP3      |
| ETV7       |
| GAS6       |
| GBP2       |
| GBP4       |
| GBP6       |
| HPSE       |
| KCNJ15     |
| KREMEN1    |
| LACTB      |
| LHFPL2     |
| LOC389386  |
| FER1L3     |
| SCARF1     |
| SEPT4      |
| SMARCD3    |
| TRAFD1     |
| VAMP5      |

**Supplementary Table 1.** Tuberculosis-related genes added to the Nanostring human immunology v2 panel.

| Null (20) | BCG (28) | IL1b (15) | TB Ag (71) |           |
|-----------|----------|-----------|------------|-----------|
| BAX       | ADA      | C1S       | ACTA2      | IL27      |
| CD46      | ALDH1A1  | CR1       | ALAS1      | IL7       |
| CD86      | BATF     | CYB561    | ANKRD22    | IRF1      |
| CLEC7A    | C7       | DEFB103B  | APOL1      | IRF8      |
| CMKLR1    | C8A      | DEFB4A    | APOL6      | JAK2      |
| CXCL1     | CCL22    | GZMA      | BATF2      | KCNJ2     |
| HAVCR2    | CD22     | HLA.DOB   | CALML4     | KLRG1     |
| IFNAR2    | CD36     | ICAM2     | CCL24      | LHFPL2    |
| IL10RA    | CD99     | KLRK1     | CD274      | LILRB4    |
| IL12RB1   | CLU      | NCR1      | CD276      | LOC389386 |
| IL1RL2    | CSF2     | NFKB1     | CD44       | LTB4R2    |
| KIT       | CTNNB1   | NOD1      | CD45R0     | MUC1      |
| LILRA2    | CTSG     | NT5E      | CD74       | PDCD1LG2  |
| MME       | IL10     | TNFRSF10C | CD83       | PECAM1    |
| PTGS2     | IL22     | TNFSF12   | CISH       | PML       |
| RPL19     | IL22RA2  |           | CLEC4A     | PRDM1     |
| S100A8    | IL6      |           | CSF2RB     | PSMB10    |
| STAT4     | IRF4     |           | CXCL2      | PTAFR     |
| STAT6     | JAK1     |           | ETV7       | PTPN22    |
| TYK2      | LAIR1    |           | FAS        | PTPRC     |
|           | NCF4     |           | FCGR1A.B   | SMAD3     |
|           | PRF1     |           | FER1L3     | SOCS1     |
|           | PSMB5    |           | FN1        | SOCS3     |
|           | PSMB7    |           | FYN        | STAT1     |
|           | PSMC2    |           | GBP1       | STAT2     |
|           | PSMD7    |           | GBP4       | STAT5A    |
|           | TRAF2    |           | GFI1       | TAP2      |
|           | sCTLA4   |           | GPR183     | TGFBI     |
|           |          |           | HLA.C      | TGFBR2    |
|           |          |           | HLA.DMA    | TLR8      |
|           |          |           | HLA.DPB1   | TNFAIP6   |
|           |          |           | HLA.DRA    | TNFSF10   |
|           |          |           | IFI16      | TNFSF13B  |
|           |          |           | IFITM1     | TRAFD1    |
|           |          |           | IFNB1      | VAMP5     |
|           |          |           | IL21       |           |

**Supplementary Table 2.** List of differentially expressed genes between LTBI and TB -only after specific stimulation (t-test with a cut-off value of  $q < 0.001$ ).

|              |       |     |            |
|--------------|-------|-----|------------|
|              | TB Ag | BCG |            |
| Different    | 62    | 40  |            |
| No different | 560   | 582 | q=0.03 (*) |

|              |       |       |                 |
|--------------|-------|-------|-----------------|
|              | TB Ag | IL-1b |                 |
| Different    | 62    | 16    |                 |
| No different | 560   | 606   | q=0.0001 (****) |

|              |     |       |              |
|--------------|-----|-------|--------------|
|              | BCG | IL-1b |              |
| Different    | 40  | 16    |              |
| No different | 582 | 606   | q=0.002 (**) |

**Supplementary Table 3.** Contingency test (Fischer's exact test) for the differentially expressed genes upon immune stimulation (BCG, IL-1 $\beta$  and TB Ag).

| q-value    |        |        |                         |                         |
|------------|--------|--------|-------------------------|-------------------------|
| Transcript | Null   | BCG    | IL-1b                   | TB Ag                   |
| CLL7       | 0.0001 | 0.6145 | 0.4439                  | 0.1676                  |
| CCL5       | 0.8021 | 0.0006 | 0.6393                  | 0.922                   |
| NFKB1      | 0.001  | 0.1019 | 2.95 x 10 <sup>-4</sup> | 0.0026                  |
| IDO1       | 0.0724 | 0.9277 | 0.443                   | 2.24 x 10 <sup>-5</sup> |

**Supplementary Table 4.** Examples of stimuli-specific induced differences between LTBI and TB with q-value specified for each condition.

| <b>BIOCHEMICAL</b>                                    | <b>Pathway</b>                                                         | <b>TB</b> | <b>LTBI</b> |
|-------------------------------------------------------|------------------------------------------------------------------------|-----------|-------------|
| 5alpha-pregnan-3beta,20alpha-diol monosulfate (2)     | Steroid                                                                | 0.55      | -0.06       |
| 5alpha-pregnan-3beta,20beta-diol monosulfate (1)      | Steroid                                                                | 0.55      | -0.05       |
| 5alpha-pregnan-3beta,20alpha-diol disulfate           | Steroid                                                                | 0.55      | -0.08       |
| pregnenediol-3-glucuronide                            | Steroid                                                                | 0.51      | -0.04       |
| sphingomyelin (d18:1/20:2, d18:2/20:1, d16:1/22:2)*   | Sphingolipid Metabolism                                                | 0.43      | -0.09       |
| 5alpha-pregnan-3(alpha or beta),20beta-diol disulfate | Steroid                                                                | 0.40      | 0.11        |
| 4-ethylphenylsulfate                                  | Benzoate Metabolism                                                    | 0.39      | -0.02       |
| stearoyl sphingomyelin (d18:1/18:0)                   | Sphingolipid Metabolism                                                | 0.37      | 0.26        |
| 1-palmitoleoylglycerol (16:1)*                        | Monoacylglycerol                                                       | 0.36      | -0.21       |
| pyrraline                                             | Food Component/Plant                                                   | 0.36      | -0.02       |
| tryptophan betaine                                    | Tryptophan Metabolism                                                  | 0.35      | -0.33       |
| sphingomyelin (d18:1/22:2, d18:2/22:1, d16:1/24:2)*   | Sphingolipid Metabolism<br>Fatty Acid Metabolism(Acyl Carnitine)       | 0.34      | -0.09       |
| 3-hydroxybutyrylcarnitine (2)                         | Carnitine)                                                             | 0.33      | 0.20        |
| 1-eicosapentaenoylglycerol (20:5)*                    | Monoacylglycerol                                                       | 0.32      | 0.05        |
| laurate (12:0)                                        | Medium Chain Fatty Acid                                                | 0.32      | 0.12        |
| N-delta-acetylorithine                                | Urea cycle; Arginine and Proline Metabolism                            | 0.31      | -0.06       |
| cystine                                               | Methionine, Cysteine, SAM and Taurine Metabolism                       | 0.30      | -0.10       |
| indole-3-carboxylic acid                              | Tryptophan Metabolism                                                  | 0.29      | 0.14        |
| sphingomyelin (d18:1/18:1, d18:2/18:0)                | Sphingolipid Metabolism                                                | 0.29      | 0.25        |
| linoleoyl-docosahexaenoyl-glycerol (18:2/22:6) [1]*   | Diacylglycerol                                                         | 0.28      | 0.21        |
| 1-linolenoylglycerol (18:3)                           | Monoacylglycerol                                                       | 0.28      | -0.07       |
| 1-arachidonoylglycerol (20:4)                         | Monoacylglycerol                                                       | 0.27      | -0.35       |
| 1-docosahexaenoylglycerol (22:6)                      | Monoacylglycerol                                                       | 0.27      | -0.11       |
| betonicine                                            | Food Component/Plant                                                   | 0.26      | -0.08       |
| sphingomyelin (d18:0/18:0, d19:0/17:0)*               | Sphingolipid Metabolism<br>Urea cycle; Arginine and Proline Metabolism | 0.26      | 0.48        |
| N-methylproline                                       | Metabolism                                                             | 0.24      | -0.07       |
| 4-methylcatechol sulfate                              | Benzoate Metabolism                                                    | 0.24      | 0.03        |
| isobutyrylcarnitine (C4)                              | Leucine, Isoleucine and Valine Metabolism                              | 0.24      | 0.16        |
| 1-arachidonoyl-GPA (20:4)                             | Lysolipid                                                              | 0.22      | -0.27       |
| p-cresol sulfate                                      | Phenylalanine and Tyrosine Metabolism                                  | 0.21      | -0.32       |
| gamma-glutamylglutamate                               | Gamma-glutamyl Amino Acid                                              | 0.20      | -0.30       |
| 2-arachidonoylglycerol (20:4)                         | Monoacylglycerol                                                       | 0.19      | -0.20       |
| 1-palmitoyl-GPA (16:0)                                | Lysolipid                                                              | 0.18      | -0.27       |

|                                                     |                                             |      |       |
|-----------------------------------------------------|---------------------------------------------|------|-------|
| oleoyl-arachidonoyl-glycerol (18:1/20:4) [1]*       | Diacylglycerol                              | 0.18 | 0.30  |
| stachydrine                                         | Food Component/Plant                        | 0.17 | -0.06 |
| 1-palmitoyl-2-oleoyl-GPI (16:0/18:1)*               | Phospholipid Metabolism                     | 0.17 | 0.05  |
| 2-palmitoleoyl-GPC (16:1)*                          | Lysolipid                                   | 0.17 | -0.02 |
| tetradecanedioate                                   | Fatty Acid, Dicarboxylate                   | 0.17 | 0.33  |
| oleoyl-arachidonoyl-glycerol (18:1/20:4) [2]*       | Diacylglycerol                              | 0.17 | 0.39  |
| 1-palmitoyl-GPG (16:0)*                             | Lysolipid                                   | 0.16 | 0.15  |
| linoleoyl-arachidonoyl-glycerol (18:2/20:4) [1]*    | Diacylglycerol                              | 0.16 | 0.01  |
| methyl glucopyranoside (alpha + beta)               | Food Component/Plant                        | 0.16 | 0.21  |
| linoleoyl-docosahexaenoyl-glycerol (18:2/22:6) [2]* | Diacylglycerol                              | 0.16 | 0.23  |
| gluconate                                           | Food Component/Plant                        | 0.16 | 0.11  |
| 1-palmitoyl-2-linoleoyl-GPI (16:0/18:2)             | Phospholipid Metabolism                     | 0.16 | 0.18  |
| glycocholate sulfate*                               | Secondary Bile Acid Metabolism              | 0.16 | 0.20  |
| sphingomyelin (d18:2/23:1)*                         | Sphingolipid Metabolism                     | 0.16 | 0.24  |
| undecanoate (11:0)                                  | Medium Chain Fatty Acid                     | 0.15 | -0.01 |
| sphingomyelin (d18:2/24:2)*                         | Sphingolipid Metabolism                     | 0.15 | -0.20 |
| indolepropionate                                    | Tryptophan Metabolism                       | 0.15 | -0.04 |
| 2-palmitoyl-GPC (16:0)*                             | Lysolipid                                   | 0.15 | -0.21 |
| palmitoleoyl-linoleoyl-glycerol (16:1/18:2) [1]*    | Diacylglycerol                              | 0.14 | 0.18  |
| sphingomyelin (d18:1/17:0, d17:1/18:0, d19:1/16:0)  | Sphingolipid Metabolism                     | 0.14 | 0.38  |
| benzoate                                            | Benzoate Metabolism                         | 0.14 | 0.21  |
| sphingomyelin (d18:2/18:1)*                         | Sphingolipid Metabolism                     | 0.14 | 0.21  |
| 1-myristoylglycerol (14:0)                          | Monoacylglycerol                            | 0.13 | -0.13 |
| 3-phenylpropionate (hydrocinnamate)                 | Phenylalanine and Tyrosine Metabolism       | 0.13 | -0.15 |
| sebacate (decanedioate)                             | Fatty Acid, Dicarboxylate                   | 0.12 | 0.43  |
| isovalerylcarnitine (C5)                            | Leucine, Isoleucine and Valine Metabolism   | 0.12 | -0.22 |
| choline                                             | Phospholipid Metabolism                     | 0.12 | 0.31  |
| 1-palmitoyl-GPC (16:0)                              | Lysolipid                                   | 0.11 | 0.17  |
| gamma-glutamylglutamine                             | Gamma-glutamyl Amino Acid                   | 0.11 | -0.18 |
| 1-oleoyl-GPA (18:1)                                 | Lysolipid                                   | 0.11 | -0.24 |
| 4-allylphenol sulfate                               | Food Component/Plant                        | 0.11 | -0.26 |
| 1-palmitoleoyl-GPC (16:1)*                          | Lysolipid                                   | 0.10 | 0.03  |
| gamma-glutamylalanine                               | Gamma-glutamyl Amino Acid                   | 0.10 | -0.31 |
| undecanedioate                                      | Fatty Acid, Dicarboxylate                   | 0.10 | 0.10  |
| docosapentaenoate (n3 DPA; 22:5n3)                  | Polyunsaturated Fatty Acid (n3 and n6)      | 0.10 | 0.07  |
| 2-oxoarginine*                                      | Urea cycle; Arginine and Proline Metabolism | 0.10 | -0.16 |
| isocitrate                                          | TCA Cycle                                   | 0.10 | 0.05  |
| 1-arachidonoyl-GPC (20:4n6)*                        | Lysolipid                                   | 0.10 | -0.19 |

|                                                       |                                           |      |       |
|-------------------------------------------------------|-------------------------------------------|------|-------|
| pentadecanoate (15:0)                                 | Long Chain Fatty Acid                     | 0.10 | 0.19  |
| 3-hydroxyhexanoate                                    | Fatty Acid, Monohydroxy                   | 0.10 | 0.44  |
| palmitoyl-linolenoyl-glycerol (16:0/18:3) [2]*        | Diacylglycerol                            | 0.10 | 0.32  |
| 1-palmitoylglycerol (16:0)                            | Monoacylglycerol                          | 0.10 | -0.32 |
| gentisate                                             | Phenylalanine and Tyrosine Metabolism     | 0.09 | 0.11  |
| diacylglycerol (16:1/18:2 [2], 16:0/18:3 [1])*        | Diacylglycerol                            | 0.09 | 0.33  |
| myristoyl dihydrosphingomyelin (d18:0/14:0)*          | Sphingolipid Metabolism                   | 0.09 | 0.23  |
| diacylglycerol (12:0/18:1, 14:0/16:1, 16:0/14:1) [2]* | Diacylglycerol                            | 0.09 | 0.32  |
| 1-palmitoyl-GPI (16:0)                                | Lysolipid                                 | 0.08 | -0.10 |
| kynurenine                                            | Tryptophan Metabolism                     | 0.08 | -0.24 |
| palmitoyl sphingomyelin (d18:1/16:0)                  | Sphingolipid Metabolism                   | 0.08 | 0.30  |
| 3-hydroxy-2-ethylpropionate                           | Leucine, Isoleucine and Valine Metabolism | 0.08 | -0.25 |
| 1-palmitoyl-2-palmitoleoyl-GPC (16:0/16:1)*           | Phospholipid Metabolism                   | 0.08 | 0.25  |
| 4-hydroxyhippurate                                    | Benzoate Metabolism                       | 0.07 | 0.16  |
| 1-palmitoyl-2-arachidonoyl-GPE (16:0/20:4)*           | Phospholipid Metabolism                   | 0.07 | 0.39  |
| linoleoyl-arachidonoyl-glycerol (18:2/20:4) [2]*      | Diacylglycerol                            | 0.07 | -0.05 |
| alpha-hydroxyisovalerate                              | Leucine, Isoleucine and Valine Metabolism | 0.07 | -0.05 |
| palmitoyl-myristoyl-glycerol (16:0/14:0) [2]          | Diacylglycerol                            | 0.06 | 0.37  |
| linoleoyl-linolenoyl-glycerol (18:2/18:3) [2]*        | Diacylglycerol                            | 0.06 | 0.06  |
| myristoylcarnitine (C14)                              | Fatty Acid Metabolism(Acyl Carnitine)     | 0.06 | 0.17  |
| isoursodeoxycholate                                   | Secondary Bile Acid Metabolism            | 0.05 | -0.02 |
| 3-carboxy-4-methyl-5-propyl-2-furanpropanoate (CMPF)  | Fatty Acid, Dicarboxylate                 | 0.05 | -0.24 |
| 2-stearoyl-GPE (18:0)*                                | Lysolipid                                 | 0.05 | 0.37  |
| palmitoyl-arachidonoyl-glycerol (16:0/20:4) [2]*      | Diacylglycerol                            | 0.05 | 0.47  |
| myristoleoylcarnitine (C14:1)*                        | Fatty Acid Metabolism(Acyl Carnitine)     | 0.05 | 0.17  |
| linoleoyl-linolenoyl-glycerol (18:2/18:3) [1]*        | Diacylglycerol                            | 0.05 | -0.03 |
| sphingomyelin (d18:1/20:1, d18:2/20:0)*               | Sphingolipid Metabolism                   | 0.04 | -0.04 |
| 1-oleoylglycerol (18:1)                               | Monoacylglycerol                          | 0.04 | -0.19 |
| sphingomyelin (d17:1/16:0, d18:1/15:0, d16:1/17:0)*   | Sphingolipid Metabolism                   | 0.04 | 0.33  |
| palmitoleoylcarnitine (C16:1)*                        | Fatty Acid Metabolism(Acyl Carnitine)     | 0.04 | 0.04  |
| sphingomyelin (d18:1/14:0, d16:1/16:0)*               | Sphingolipid Metabolism                   | 0.04 | 0.20  |
| succinylcarnitine (C4-DC)                             | TCA Cycle                                 | 0.04 | 0.31  |
| glycosyl-N-stearoyl-sphingosine (d18:1/18:0)          | Sphingolipid Metabolism                   | 0.03 | 0.07  |



|                                             |                                                  |       |       |
|---------------------------------------------|--------------------------------------------------|-------|-------|
| methionine sulfoxide                        | Methionine, Cysteine, SAM and Taurine Metabolism | 0.03  | -0.19 |
| erythritol                                  | Food Component/Plant                             | 0.03  | 0.07  |
| 1-palmitoyl-GPE (16:0)                      | Lysolipid                                        | 0.03  | 0.62  |
| diacylglycerol (14:0/18:1, 16:0/16:1) [2]*  | Diacylglycerol                                   | 0.03  | 0.44  |
| 1-stearoyl-2-oleoyl-GPI (18:0/18:1)*        | Phospholipid Metabolism                          | 0.03  | -0.09 |
| docosahexaenoate (DHA; 22:6n3)              | Polyunsaturated Fatty Acid (n3 and n6)           | 0.02  | 0.12  |
| behenoyl dihydrosphingomyelin (d18:0/22:0)* | Sphingolipid Metabolism                          | 0.02  | 0.37  |
| sphingomyelin (d18:2/16:0, d18:1/16:1)*     | Sphingolipid Metabolism                          | 0.02  | 0.17  |
| citrulline                                  | Urea cycle; Arginine and Proline Metabolism      | 0.02  | -0.03 |
| diacylglycerol (14:0/18:1, 16:0/16:1) [1]*  | Diacylglycerol                                   | 0.02  | 0.43  |
| sphingomyelin (d18:2/21:0, d16:2/23:0)*     | Sphingolipid Metabolism                          | 0.02  | 0.29  |
| sphingomyelin (d18:1/19:0, d19:1/18:0)*     | Sphingolipid Metabolism                          | 0.02  | 0.42  |
| 1-linoleoylglycerol (18:2)                  | Monoacylglycerol                                 | 0.02  | -0.47 |
| 1-palmitoyl-2-oleoyl-GPC (16:0/18:1)        | Phospholipid Metabolism                          | 0.02  | 0.24  |
| dihomo-linoleate (20:2n6)                   | Polyunsaturated Fatty Acid (n3 and n6)           | 0.02  | -0.03 |
| pelargonate (9:0)                           | Medium Chain Fatty Acid                          | 0.01  | -0.06 |
| piperine                                    | Food Component/Plant                             | 0.01  | 0.10  |
| 2-methylbutyrylcarnitine (C5)               | Leucine, Isoleucine and Valine Metabolism        | 0.01  | 0.09  |
| saccharin                                   | Food Component/Plant                             | 0.01  | -0.21 |
| p-cresol-glucuronide*                       | Phenylalanine and Tyrosine Metabolism            | 0.01  | 0.15  |
| betaine                                     | Glycine, Serine and Threonine Metabolism         | 0.01  | -0.19 |
| 1-palmitoleoyl-2-linoleoyl-GPC (16:1/18:2)* | Phospholipid Metabolism                          | 0.01  | -0.02 |
| 3-indoxyl sulfate                           | Tryptophan Metabolism                            | 0.00  | -0.18 |
| oleoyl-oleoyl-glycerol (18:1/18:1) [2]*     | Diacylglycerol                                   | 0.00  | 0.50  |
| glycolithocholate sulfate*                  | Secondary Bile Acid Metabolism                   | 0.00  | -0.01 |
| glycoursodeoxycholate                       | Secondary Bile Acid Metabolism                   | 0.00  | 0.05  |
| 3-methoxytyrosine                           | Phenylalanine and Tyrosine Metabolism            | 0.00  | -0.08 |
| 1-linoleoyl-GPA (18:2)*                     | Lysolipid                                        | 0.00  | -0.31 |
| 2-palmitoylglycerol (16:0)                  | Monoacylglycerol                                 | 0.00  | -0.21 |
| 1-stearoyl-GPE (18:0)                       | Lysolipid                                        | 0.00  | 0.61  |
| linoleate (18:2n6)                          | Polyunsaturated Fatty Acid (n3 and n6)           | 0.00  | 0.03  |
| proline                                     | Urea cycle; Arginine and Proline Metabolism      | 0.00  | -0.01 |
| 1-palmitoyl-2-linoleoyl-GPE (16:0/18:2)     | Phospholipid Metabolism                          | 0.00  | 0.55  |
| picolinate                                  | Tryptophan Metabolism                            | 0.00  | 0.28  |
| N-acetylvaline                              | Leucine, Isoleucine and Valine Metabolism        | -0.61 | 0.16  |

|                                            |                                                                 |       |       |
|--------------------------------------------|-----------------------------------------------------------------|-------|-------|
| N-acetylleucine                            | Leucine, Isoleucine and Valine Metabolism                       | -0.54 | -0.04 |
| N-acetylglutamine                          | Glutamate Metabolism                                            | -0.52 | -0.30 |
| gamma-glutamylthreonine                    | Gamma-glutamyl Amino Acid Phenylalanine and Tyrosine Metabolism | -0.45 | -0.15 |
| 3-(4-hydroxyphenyl)lactate                 | Metabolism                                                      | -0.45 | -0.22 |
| 2-hydroxyoctanoate                         | Fatty Acid, Monohydroxy                                         | -0.44 | -0.16 |
| indolelactate                              | Tryptophan Metabolism                                           | -0.42 | -0.20 |
| gamma-glutamylleucine                      | Gamma-glutamyl Amino Acid                                       | -0.42 | -0.13 |
| gamma-glutamyltyrosine                     | Gamma-glutamyl Amino Acid                                       | -0.42 | -0.20 |
| 2-keto-3-deoxy-gluconate                   | Food Component/Plant Leucine, Isoleucine and Valine Metabolism  | -0.41 | 0.07  |
| N-acetylisoleucine                         | Metabolism                                                      | -0.41 | -0.17 |
| gamma-glutamyl-epsilon-lysine              | Gamma-glutamyl Amino Acid                                       | -0.40 | -0.02 |
| gamma-glutamylvaline                       | Gamma-glutamyl Amino Acid                                       | -0.39 | 0.13  |
| 13-HODE + 9-HODE                           | Fatty Acid, Monohydroxy                                         | -0.39 | 0.08  |
| 1-oleoyl-GPS (18:1)                        | Lysolipid                                                       | -0.39 | -0.04 |
| cysteine                                   | Methionine, Cysteine, SAM and Taurine Metabolism                | -0.38 | -0.03 |
| imidazole lactate                          | Histidine Metabolism                                            | -0.38 | -0.09 |
| alliin                                     | Food Component/Plant Leucine, Isoleucine and Valine Metabolism  | -0.38 | -0.09 |
| valine                                     | Metabolism                                                      | -0.37 | 0.13  |
| tryptophan                                 | Tryptophan Metabolism                                           | -0.36 | -0.15 |
| N-acetylarginine                           | Urea cycle; Arginine and Proline Metabolism                     | -0.36 | 0.07  |
| thymol sulfate                             | Food Component/Plant                                            | -0.36 | 0.26  |
| 5-acetylamino-6-formylamino-3-methyluracil | Xanthine Metabolism                                             | -0.36 | -0.19 |
| trans-urocanate                            | Histidine Metabolism                                            | -0.35 | -0.07 |
| pyroglutamine*                             | Glutamate Metabolism                                            | -0.35 | -0.23 |
| 3-methylxanthine                           | Xanthine Metabolism                                             | -0.35 | 0.22  |
| trans-4-hydroxyproline                     | Urea cycle; Arginine and Proline Metabolism                     | -0.35 | 0.24  |
| N-acetylglutamate                          | Glutamate Metabolism                                            | -0.35 | 0.45  |
| N-acetylphenylalanine                      | Phenylalanine and Tyrosine Metabolism                           | -0.34 | -0.44 |
| glycerophosphorylcholine (GPC)             | Phospholipid Metabolism                                         | -0.34 | 0.18  |
| glycerophosphoethanolamine                 | Phospholipid Metabolism                                         | -0.34 | 0.27  |
| N-formylmethionine                         | Methionine, Cysteine, SAM and Taurine Metabolism                | -0.34 | 0.17  |
| gamma-glutamylisoleucine*                  | Gamma-glutamyl Amino Acid                                       | -0.34 | 0.00  |
| N-acetylhistidine                          | Histidine Metabolism                                            | -0.33 | -0.05 |
| theobromine                                | Xanthine Metabolism                                             | -0.33 | -0.08 |
| kynurenate                                 | Tryptophan Metabolism                                           | -0.32 | -0.19 |
| glutamate                                  | Glutamate Metabolism                                            | -0.32 | -0.03 |
| threonine                                  | Glycine, Serine and Threonine Metabolism                        | -0.32 | -0.13 |

|                                                     |                                                  |       |       |
|-----------------------------------------------------|--------------------------------------------------|-------|-------|
| 5alpha-androstan-3beta,17beta-diol monosulfate (2)  | Steroid                                          | -0.32 | -0.33 |
| 1-linoleoyl-GPG (18:2)*                             | Lysolipid                                        | -0.32 | -0.24 |
| glutamine                                           | Glutamate Metabolism                             | -0.31 | -0.02 |
| 1,7-dimethylurate                                   | Xanthine Metabolism                              | -0.31 | 0.04  |
| choline phosphate                                   | Phospholipid Metabolism                          | -0.31 | 0.04  |
| malate                                              | TCA Cycle                                        | -0.31 | 0.10  |
| 2-hydroxyglutarate                                  | Fatty Acid, Dicarboxylate                        | -0.31 | 0.13  |
| cortisol                                            | Steroid                                          | -0.31 | 0.38  |
| paraxanthine                                        | Xanthine Metabolism                              | -0.30 | 0.06  |
| homoarginine                                        | Urea cycle; Arginine and Proline Metabolism      | -0.30 | -0.20 |
| 5alpha-androstan-3alpha,17beta-diol monosulfate (1) | Steroid                                          | -0.30 | -0.27 |
| N-acetylserine                                      | Glycine, Serine and Threonine Metabolism         | -0.30 | 0.32  |
| N-acetyltyrosine                                    | Phenylalanine and Tyrosine Metabolism            | -0.30 | -0.17 |
| gamma-glutamyl-alpha-lysine                         | Gamma-glutamyl Amino Acid                        | -0.30 | -0.02 |
| dimethylarginine (SDMA + ADMA)                      | Urea cycle; Arginine and Proline Metabolism      | -0.29 | 0.15  |
| 1,3,7-trimethylurate                                | Xanthine Metabolism                              | -0.29 | -0.15 |
| 1-linoleoyl-GPE (18:2)*                             | Lysolipid                                        | -0.29 | -0.06 |
| 1,2-dilinoeloyl-GPC (18:2/18:2)                     | Phospholipid Metabolism                          | -0.29 | -0.16 |
| 1-methylhistidine                                   | Histidine Metabolism                             | -0.29 | 0.04  |
| 1-stearoyl-2-linoleoyl-GPC (18:0/18:2)*             | Phospholipid Metabolism                          | -0.29 | 0.03  |
| N-behenoyl-sphingadienine (d18:2/22:0)*             | Sphingolipid Metabolism                          | -0.29 | 0.18  |
| 1-methylxanthine                                    | Xanthine Metabolism                              | -0.29 | 0.19  |
| S-adenosylhomocysteine (SAH)                        | Methionine, Cysteine, SAM and Taurine Metabolism | -0.29 | -0.02 |
| 2-methylcitrate/homocitrate                         | TCA Cycle                                        | -0.28 | -0.10 |
| alpha-hydroxyisocaproate                            | Leucine, Isoleucine and Valine Metabolism        | -0.28 | 0.03  |
| lactosyl-N-nervonoyl-sphingosine (d18:1/24:1)*      | Sphingolipid Metabolism                          | -0.28 | -0.17 |
| urea                                                | Urea cycle; Arginine and Proline Metabolism      | -0.28 | 0.40  |
| gamma-glutamylhistidine                             | Gamma-glutamyl Amino Acid                        | -0.28 | -0.21 |
| 3-hydroxyhippurate                                  | Benzoate Metabolism                              | -0.27 | -0.09 |
| 3-methyl-2-oxovalerate                              | Leucine, Isoleucine and Valine Metabolism        | -0.27 | 0.14  |
| adipate                                             | Fatty Acid, Dicarboxylate                        | -0.27 | 0.10  |
| propyl 4-hydroxybenzoate sulfate                    | Benzoate Metabolism                              | -0.27 | 0.03  |
| glycosyl-N-palmitoyl-sphingosine (d18:1/16:0)       | Sphingolipid Metabolism                          | -0.27 | 0.33  |
| citrate                                             | TCA Cycle                                        | -0.27 | -0.23 |
| lignoceroyl sphingomyelin (d18:1/24:0)              | Sphingolipid Metabolism                          | -0.26 | 0.06  |
| androstenediol (3alpha, 17alpha) monosulfate (2)    | Steroid                                          | -0.26 | -0.20 |
| behenoyl sphingomyelin (d18:1/22:0)*                | Sphingolipid Metabolism                          | -0.26 | 0.28  |

|                                               |                                                                   |       |       |
|-----------------------------------------------|-------------------------------------------------------------------|-------|-------|
| 4-hydroxyphenylpyruvate                       | Phenylalanine and Tyrosine Metabolism                             | -0.26 | 0.39  |
| succinate                                     | TCA Cycle                                                         | -0.26 | 0.28  |
| 1-arachidonoyl-GPE (20:4n6)*                  | Lysolipid                                                         | -0.26 | 0.08  |
| S-methylcysteine                              | Methionine, Cysteine, SAM and Taurine Metabolism                  | -0.26 | -0.35 |
| N-acetyl-1-methylhistidine*                   | Histidine Metabolism                                              | -0.26 | 0.12  |
| octadecanedioate                              | Fatty Acid, Dicarboxylate                                         | -0.25 | 0.42  |
| fumarate                                      | TCA Cycle                                                         | -0.25 | 0.08  |
| 2-hydroxydecanoate                            | Fatty Acid, Monohydroxy Glycine, Serine and Threonine Metabolism  | -0.25 | -0.11 |
| sarcosine                                     | Phenylalanine and Tyrosine Metabolism                             | -0.25 | 0.01  |
| 5-bromotryptophan                             | Methionine, Cysteine, SAM and Taurine Metabolism                  | -0.25 | -0.34 |
| hypotaurine                                   | Lysolipid                                                         | -0.25 | 0.04  |
| 1-arachidonoyl-GPI (20:4)*                    | Lysolipid                                                         | -0.25 | -0.11 |
| androstenediol (3beta,17beta) disulfate (2)   | Steroid                                                           | -0.25 | -0.20 |
| taurine                                       | Methionine, Cysteine, SAM and Taurine Metabolism                  | -0.24 | -0.07 |
| phenylalanine                                 | Phenylalanine and Tyrosine Metabolism                             | -0.24 | 0.01  |
| 3-methyl-2-oxobutyrate                        | Leucine, Isoleucine and Valine Metabolism                         | -0.24 | 0.15  |
| cerotoylcarnitine (C26)*                      | Fatty Acid Metabolism(Acyl Carnitine)                             | -0.24 | 0.17  |
| 5alpha-androstan-3beta,17alpha-diol disulfate | Steroid                                                           | -0.24 | -0.49 |
| 16-hydroxypalmitate                           | Fatty Acid, Monohydroxy Leucine, Isoleucine and Valine Metabolism | -0.24 | 0.34  |
| leucine                                       | Phenylalanine and Tyrosine Metabolism                             | -0.24 | 0.11  |
| tyrosine                                      | Phenylalanine and Tyrosine Metabolism                             | -0.23 | 0.09  |
| 8-hydroxyoctanoate                            | Fatty Acid, Monohydroxy                                           | -0.23 | 0.20  |
| 1-linoleoyl-GPI (18:2)*                       | Lysolipid                                                         | -0.23 | 0.03  |
| maleate                                       | Fatty Acid, Dicarboxylate                                         | -0.23 | 0.58  |
| 3-hydroxylaurate                              | Fatty Acid, Monohydroxy                                           | -0.23 | 0.59  |
| glycohyocholate                               | Secondary Bile Acid Metabolism                                    | -0.23 | 0.11  |
| trimethylamine N-oxide                        | Phospholipid Metabolism                                           | -0.23 | 0.29  |
| stearoylcarnitine (C18)                       | Fatty Acid Metabolism(Acyl Carnitine)                             | -0.23 | 0.19  |
| gamma-glutamylphenylalanine                   | Gamma-glutamyl Amino Acid                                         | -0.22 | -0.18 |
| azelate (nonanedioate)                        | Fatty Acid, Dicarboxylate                                         | -0.22 | -0.20 |
| isovalerylglycine                             | Leucine, Isoleucine and Valine Metabolism                         | -0.22 | -0.07 |
| catechol sulfate                              | Benzoate Metabolism                                               | -0.22 | -0.07 |
| theophylline                                  | Xanthine Metabolism                                               | -0.22 | -0.03 |
| 5alpha-androstan-3alpha,17beta-diol disulfate | Steroid                                                           | -0.22 | -0.01 |
| nervonate (24:1n9)*                           | Long Chain Fatty Acid                                             | -0.22 | 0.18  |

|                                                        |                                                  |       |       |
|--------------------------------------------------------|--------------------------------------------------|-------|-------|
| 1-(1-enyl-palmitoyl)-2-arachidonoyl-GPC (P-16:0/20:4)* | Plasmalogen                                      | -0.22 | -0.10 |
| eicosanodioate                                         | Fatty Acid, Dicarboxylate                        | -0.22 | -0.25 |
| o-cresol sulfate                                       | Phenylalanine and Tyrosine Metabolism            | -0.21 | 0.06  |
| C-glycosyltryptophan                                   | Tryptophan Metabolism                            | -0.21 | -0.19 |
| behenate (22:0)*                                       | Long Chain Fatty Acid                            | -0.21 | -0.25 |
| sphinganine-1-phosphate                                | Sphingolipid Metabolism                          | -0.21 | -0.09 |
| dihomo-linoleoylcarnitine (C20:2)*                     | Fatty Acid Metabolism(Acyl Carnitine)            | -0.21 | 0.00  |
| S-methylcysteine sulfoxide                             | Methionine, Cysteine, SAM and Taurine Metabolism | -0.21 | -0.09 |
| etiocholanolone glucuronide                            | Steroid                                          | -0.21 | 0.07  |
| quinat                                                 | Food Component/Plant                             | -0.20 | -0.11 |
| N-acetylmethionine                                     | Methionine, Cysteine, SAM and Taurine Metabolism | -0.20 | 0.01  |
| indoleacetate                                          | Tryptophan Metabolism                            | -0.20 | -0.01 |
| formiminoglutamate                                     | Histidine Metabolism                             | -0.20 | 0.33  |
| caffeine                                               | Xanthine Metabolism                              | -0.20 | -0.01 |
| sphingomyelin (d18:2/14:0, d18:1/14:1)*                | Sphingolipid Metabolism                          | -0.20 | -0.07 |
| docosadioate                                           | Fatty Acid, Dicarboxylate                        | -0.20 | -0.13 |
| dimethylglycine                                        | Glycine, Serine and Threonine Metabolism         | -0.20 | 0.18  |
| N-acetyltryptophan                                     | Tryptophan Metabolism                            | -0.20 | -0.19 |
| 7-methylurate                                          | Xanthine Metabolism                              | -0.20 | 0.18  |
| docosapentaenoate (n6 DPA; 22:5n6)                     | Polyunsaturated Fatty Acid (n3 and n6)           | -0.20 | 0.04  |
| hyocholate                                             | Secondary Bile Acid Metabolism                   | -0.20 | 0.12  |
| 3-methyl catechol sulfate (1)                          | Benzoate Metabolism                              | -0.19 | 0.03  |
| androstenediol (3beta,17beta) disulfate (1)            | Steroid                                          | -0.19 | -0.28 |
| 1-stearoyl-2-linoleoyl-GPI (18:0/18:2)                 | Phospholipid Metabolism                          | -0.19 | 0.11  |
| 1-(1-enyl-palmitoyl)-2-linoleoyl-GPE (P-16:0/18:2)*    | Plasmalogen                                      | -0.19 | 0.33  |
| O-methylcatechol sulfate                               | Benzoate Metabolism                              | -0.19 | 0.08  |
| N-acetyltaurine                                        | Methionine, Cysteine, SAM and Taurine Metabolism | -0.19 | -0.36 |
| androsterone sulfate                                   | Steroid                                          | -0.19 | -0.36 |
| argininosuccinate                                      | Urea cycle; Arginine and Proline Metabolism      | -0.19 | 0.43  |
| pregnen-diol disulfate*                                | Steroid                                          | -0.19 | -0.22 |
| 1-oleoyl-GPE (18:1)                                    | Lysolipid                                        | -0.18 | 0.15  |
| ximenoylcarnitine (C26:1)*                             | Fatty Acid Metabolism(Acyl Carnitine)            | -0.18 | 0.04  |
| docosapentaenoylcarnitine (C22:5n3)*                   | Fatty Acid Metabolism(Acyl Carnitine)            | -0.18 | 0.00  |
| myristoleate (14:1n5)                                  | Long Chain Fatty Acid                            | -0.18 | 0.30  |
| 1-linoleoyl-2-linolenoyl-GPC (18:2/18:3)*              | Phospholipid Metabolism                          | -0.18 | 0.07  |
| androstenediol (3beta,17beta) monosulfate (2)          | Steroid                                          | -0.18 | -0.38 |

|                                                                                |                                                  |       |       |
|--------------------------------------------------------------------------------|--------------------------------------------------|-------|-------|
| 1-(1-enyl-palmitoyl)-2-palmitoyl-GPC (P-16:0/16:0)*                            | Plasmalogen                                      | -0.18 | 0.04  |
| eugenol sulfate                                                                | Food Component/Plant                             | -0.18 | 0.39  |
| 1-linoleoyl-GPC (18:2)                                                         | Lysolipid                                        | -0.18 | -0.28 |
| cysteine s-sulfate                                                             | Methionine, Cysteine, SAM and Taurine Metabolism | -0.18 | -0.07 |
| methyl-4-hydroxybenzoate sulfate                                               | Benzoate Metabolism                              | -0.18 | -0.09 |
| N-alpha-acetylornithine tricosanoyl sphingomyelin (d18:1/23:0)*                | Urea cycle; Arginine and Proline Metabolism      | -0.18 | -0.02 |
| arachidoylcarnitine (C20)*                                                     | Sphingolipid Metabolism                          | -0.17 | 0.34  |
| linoleoylcarnitine (C18:2)*                                                    | Fatty Acid Metabolism(Acyl Carnitine)            | -0.17 | 0.19  |
| 1-linoleoyl-2-arachidonoyl-GPC (18:2/20:4n6)*                                  | Fatty Acid Metabolism(Acyl Carnitine)            | -0.17 | -0.11 |
| lignoceroylcarnitine (C24)*                                                    | Phospholipid Metabolism                          | -0.17 | 0.01  |
| 1,3-dimethylurate                                                              | Fatty Acid Metabolism(Acyl Carnitine)            | -0.17 | -0.04 |
| palmitoyl-palmitoyl-glycerol (16:0/16:0) [1]*                                  | Xanthine Metabolism                              | -0.17 | -0.09 |
| androstenediol (3beta,17beta) monosulfate (1)                                  | Diacylglycerol                                   | -0.17 | 0.45  |
| pregn steroid monosulfate*                                                     | Steroid                                          | -0.17 | -0.14 |
| 5alpha-androstan-3beta,17beta-diol disulfate                                   | Steroid                                          | -0.17 | -0.28 |
| N-acetylthreonine                                                              | Steroid                                          | -0.17 | -0.34 |
| 1-methylimidazoleacetate                                                       | Glycine, Serine and Threonine Metabolism         | -0.17 | 0.11  |
| stearate (18:0)                                                                | Histidine Metabolism                             | -0.17 | 0.06  |
| 2-oleoylglycerol (18:1)                                                        | Long Chain Fatty Acid                            | -0.16 | 0.14  |
| 3-hydroxydecanoate                                                             | Monoacylglycerol                                 | -0.16 | -0.08 |
| cortisone                                                                      | Fatty Acid, Monohydroxy                          | -0.16 | 0.69  |
| epiandrosterone sulfate                                                        | Steroid                                          | -0.16 | -0.22 |
| 1-palmitoyl-2-stearoyl-GPC (16:0/18:0) sphingomyelin (d18:1/24:1, d18:2/24:0)* | Steroid                                          | -0.16 | -0.36 |
| caprylate (8:0)                                                                | Phospholipid Metabolism                          | -0.15 | 0.41  |
| thyroxine                                                                      | Sphingolipid Metabolism                          | -0.15 | -0.09 |
| 5-acetylamino-6-amino-3-methyluracil                                           | Medium Chain Fatty Acid                          | -0.15 | -0.36 |
| stearidonate (18:4n3)                                                          | Phenylalanine and Tyrosine Metabolism            | -0.15 | -0.17 |
| dopamine 3-O-sulfate                                                           | Xanthine Metabolism                              | -0.15 | 0.02  |
| methionine                                                                     | Polyunsaturated Fatty Acid (n3 and n6)           | -0.15 | 0.25  |
| sphingomyelin (d18:1/22:1, d18:2/22:0, d16:1/24:1)*                            | Phenylalanine and Tyrosine Metabolism            | -0.15 | -0.27 |
| erucate (22:1n9)                                                               | Methionine, Cysteine, SAM and Taurine Metabolism | -0.15 | -0.24 |
| N-(2-furoyl)glycine                                                            | Sphingolipid Metabolism                          | -0.15 | 0.06  |
| beta-citrylglutamate                                                           | Long Chain Fatty Acid                            | -0.15 | 0.01  |
|                                                                                | Food Component/Plant                             | -0.15 | -0.23 |
|                                                                                | Glutamate Metabolism                             | -0.15 | 0.05  |

|                                                                 |                                             |       |       |
|-----------------------------------------------------------------|---------------------------------------------|-------|-------|
| 1-stearoyl-2-arachidonoyl-GPE (18:0/20:4)                       | Phospholipid Metabolism                     | -0.15 | 0.35  |
| 4-methyl-2-oxopentanoate                                        | Leucine, Isoleucine and Valine Metabolism   | -0.15 | 0.19  |
| N-formylphenylalanine                                           | Phenylalanine and Tyrosine Metabolism       | -0.15 | -0.02 |
| 1-palmitoyl-2-linoleoyl-GPC (16:0/18:2)                         | Phospholipid Metabolism                     | -0.14 | 0.26  |
| andro steroid monosulfate (1)*                                  | Steroid                                     | -0.14 | -0.30 |
| S-1-pyrroline-5-carboxylate                                     | Glutamate Metabolism                        | -0.14 | -0.07 |
| 5-dodecenoate (12:1n7)                                          | Medium Chain Fatty Acid                     | -0.14 | 0.34  |
| serine                                                          | Glycine, Serine and Threonine Metabolism    | -0.14 | -0.45 |
| adrenoylcarnitine (C22:4)*                                      | Fatty Acid Metabolism(Acyl Carnitine)       | -0.14 | -0.07 |
| sphingomyelin (d18:1/25:0, d19:0/24:1, d20:1/23:0, d19:1/24:0)* | Sphingolipid Metabolism                     | -0.14 | 0.19  |
| 1-oleoyl-GPI (18:1)*                                            | Lysolipid                                   | -0.14 | -0.12 |
| dihomo-linolenate (20:3n3 or n6)                                | Polyunsaturated Fatty Acid (n3 and n6)      | -0.14 | -0.19 |
| 2-hydroxy-3-methylvalerate                                      | Leucine, Isoleucine and Valine Metabolism   | -0.14 | -0.02 |
| ornithine                                                       | Urea cycle; Arginine and Proline Metabolism | -0.14 | -0.14 |
| imidazole propionate                                            | Histidine Metabolism                        | -0.13 | 0.23  |
| eicosenoylcarnitine (C20:1)*                                    | Fatty Acid Metabolism(Acyl Carnitine)       | -0.13 | 0.11  |
| 1-stearoyl-GPI (18:0)                                           | Lysolipid                                   | -0.13 | -0.20 |
| docosadienoate (22:2n6)                                         | Polyunsaturated Fatty Acid (n3 and n6)      | -0.13 | 0.10  |
| 1-(1-enyl-stearoyl)-2-arachidonoyl-GPE (P-18:0/20:4)*           | Plasmalogen                                 | -0.13 | 0.44  |
| acetylcarnitine (C2)                                            | Fatty Acid Metabolism(Acyl Carnitine)       | -0.13 | 0.45  |
| arachidate (20:0)                                               | Long Chain Fatty Acid                       | -0.13 | -0.08 |
| 2-hydroxyhippurate (salicylurate)                               | Benzoate Metabolism                         | -0.13 | 0.29  |
| glycine                                                         | Glycine, Serine and Threonine Metabolism    | -0.13 | -0.10 |
| 5-hydroxymethyl-2-furoic acid                                   | Phenylalanine and Tyrosine Metabolism       | -0.13 | -0.18 |
| 2-hydroxystearate                                               | Fatty Acid, Monohydroxy                     | -0.13 | -0.03 |
| gamma-glutamyltryptophan                                        | Gamma-glutamyl Amino Acid                   | -0.13 | -0.21 |
| 1-(1-enyl-palmitoyl)-2-linoleoyl-GPC (P-16:0/18:2)*             | Plasmalogen                                 | -0.12 | -0.09 |
| sphingosine 1-phosphate                                         | Sphingolipid Metabolism                     | -0.12 | -0.29 |
| palmitoyl-oleoyl-glycerol (16:0/18:1) [1]*                      | Diacylglycerol                              | -0.12 | 0.63  |
| 1-(1-enyl-palmitoyl)-2-oleoyl-GPC (P-16:0/18:1)*                | Plasmalogen                                 | -0.12 | -0.05 |
| histidine                                                       | Histidine Metabolism                        | -0.12 | 0.00  |
| sphingomyelin (d18:2/23:0, d18:1/23:1, d17:1/24:1)*             | Sphingolipid Metabolism                     | -0.12 | 0.10  |
| glycodeoxycholate                                               | Secondary Bile Acid Metabolism              | -0.12 | 0.25  |
| phenol sulfate                                                  | Phenylalanine and Tyrosine Metabolism       | -0.12 | -0.37 |

|                                                        |                                                            |       |       |
|--------------------------------------------------------|------------------------------------------------------------|-------|-------|
| hippurate                                              | Benzoate Metabolism                                        | -0.12 | 0.20  |
| octanoylcarnitine (C8)                                 | Fatty Acid Metabolism(Acyl Carnitine)                      | -0.12 | 0.44  |
| cinnamoylglycine                                       | Food Component/Plant Fatty Acid Metabolism(Acyl Carnitine) | -0.12 | -0.10 |
| margaroylcarnitine*                                    | Fatty Acid Metabolism(Acyl Carnitine)                      | -0.12 | 0.25  |
| 1,2-dipalmitoyl-GPC (16:0/16:0)                        | Phospholipid Metabolism                                    | -0.12 | 0.40  |
| linolenate [alpha or gamma; (18:3n3 or 6)]             | Polyunsaturated Fatty Acid (n3 and n6)                     | -0.11 | 0.09  |
| 3-hydroxystearate                                      | Fatty Acid, Monohydroxy                                    | -0.11 | 0.19  |
| androstenediol (3alpha, 17alpha) monsulfate (3)        | Steroid                                                    | -0.11 | -0.32 |
| alpha-ketoglutarate                                    | TCA Cycle                                                  | -0.11 | 0.22  |
| argininate*                                            | Urea cycle; Arginine and Proline Metabolism                | -0.11 | 0.36  |
| eicosenoate (20:1)                                     | Long Chain Fatty Acid                                      | -0.11 | 0.11  |
| 1-stearoyl-2-arachidonoyl-GPC (18:0/20:4)              | Phospholipid Metabolism                                    | -0.11 | -0.19 |
| oleate/vaccenate (18:1)                                | Long Chain Fatty Acid                                      | -0.11 | 0.22  |
| phenyllactate (PLA)                                    | Phenylalanine and Tyrosine Metabolism                      | -0.11 | -0.07 |
| myristate (14:0)                                       | Long Chain Fatty Acid                                      | -0.11 | 0.20  |
| arachidonoylcarnitine (C20:4)                          | Fatty Acid Metabolism(Acyl Carnitine)                      | -0.11 | -0.07 |
| oleoylcarnitine (C18:1)                                | Fatty Acid Metabolism(Acyl Carnitine)                      | -0.11 | -0.14 |
| 1-(1-enyl-palmitoyl)-2-arachidonoyl-GPE (P-16:0/20:4)* | Plasmalogen                                                | -0.11 | 0.21  |
| N-palmitoyl-sphinganine (d18:0/16:0)                   | Sphingolipid Metabolism                                    | -0.11 | 0.45  |
| sphingosine                                            | Sphingolipid Metabolism                                    | -0.11 | -0.22 |
| 1-linolenoyl-GPC (18:3)*                               | Lysolipid                                                  | -0.10 | -0.03 |
| N-acetylglycine                                        | Glycine, Serine and Threonine Metabolism                   | -0.10 | 0.01  |
| hexadecanedioate                                       | Fatty Acid, Dicarboxylate                                  | -0.10 | 0.51  |
| methylsuccinate                                        | Leucine, Isoleucine and Valine Metabolism                  | -0.10 | 0.25  |
| N-stearoyl-sphingosine (d18:1/18:0)*                   | Sphingolipid Metabolism                                    | -0.10 | 0.62  |
| pro-hydroxy-pro                                        | Urea cycle; Arginine and Proline Metabolism                | -0.10 | 0.19  |
| taurodeoxycholate                                      | Secondary Bile Acid Metabolism                             | -0.10 | 0.14  |
| 1-stearoyl-2-arachidonoyl-GPI (18:0/20:4)              | Phospholipid Metabolism                                    | -0.10 | -0.20 |
| 1-palmitoyl-2-arachidonoyl-GPI (16:0/20:4)*            | Phospholipid Metabolism                                    | -0.10 | 0.00  |
| palmitoyl-oleoyl-glycerol (16:0/18:1) [2]*             | Diacylglycerol                                             | -0.10 | 0.64  |
| methionine sulfone                                     | Methionine, Cysteine, SAM and Taurine Metabolism           | -0.10 | -0.06 |
| phosphoethanolamine                                    | Phospholipid Metabolism                                    | -0.10 | 0.23  |
| 1-stearoyl-GPS (18:0)*                                 | Lysolipid                                                  | -0.10 | -0.14 |
| 1-dihomo-linolenylglycerol (20:3)                      | Monoacylglycerol                                           | -0.09 | -0.49 |
| palmitoyl dihydrosphingomyelin (d18:0/16:0)*           | Sphingolipid Metabolism                                    | -0.09 | 0.31  |



|                                                        |                                                               |       |       |
|--------------------------------------------------------|---------------------------------------------------------------|-------|-------|
| 2-ethylphenylsulfate                                   | Benzoate Metabolism                                           | -0.09 | 0.09  |
| cis-aconitate                                          | TCA Cycle                                                     | -0.09 | -0.15 |
| palmitoleate (16:1n7)                                  | Long Chain Fatty Acid                                         | -0.09 | 0.19  |
| dihomo-linolenoylcarnitine (20:3n3 or 6)*              | Fatty Acid Metabolism(Acyl Carnitine)                         | -0.09 | -0.11 |
| decanoylcarnitine (C10)                                | Fatty Acid Metabolism(Acyl Carnitine)                         | -0.09 | 0.34  |
| 3-methoxycatechol sulfate (1)                          | Benzoate Metabolism                                           | -0.09 | 0.21  |
| ergothioneine                                          | Food Component/Plant                                          | -0.09 | -0.12 |
| heptanoate (7:0)                                       | Medium Chain Fatty Acid                                       | -0.09 | 0.27  |
| N-palmitoyl-sphingosine (d18:1/16:0)                   | Sphingolipid Metabolism                                       | -0.09 | 0.41  |
| 10-nonadecenoate (19:1n9)                              | Long Chain Fatty Acid                                         | -0.09 | 0.24  |
| taurocholate sulfate                                   | Secondary Bile Acid Metabolism                                | -0.09 | 0.14  |
| stearoyl-arachidonoyl-glycerol (18:0/20:4) [2]*        | Diacylglycerol                                                | -0.09 | 0.48  |
| 4-vinylphenol sulfate                                  | Benzoate Metabolism                                           | -0.08 | -0.06 |
| 1-stearoyl-GPC (18:0)                                  | Lysolipid                                                     | -0.08 | 0.06  |
| 1-stearoyl-2-oleoyl-GPC (18:0/18:1)                    | Phospholipid Metabolism                                       | -0.08 | 0.26  |
| glycodeoxycholate sulfate                              | Secondary Bile Acid Metabolism                                | -0.08 | 0.27  |
| 1-stearoyl-2-oleoyl-GPE (18:0/18:1)                    | Phospholipid Metabolism                                       | -0.08 | 0.37  |
| 1-(1-enyl-palmitoyl)-2-oleoyl-GPE (P-16:0/18:1)*       | Plasmalogen                                                   | -0.08 | 0.20  |
| nonadecanoate (19:0)                                   | Long Chain Fatty Acid                                         | -0.08 | 0.00  |
| gamma-glutamylmethionine                               | Gamma-glutamyl Amino Acid                                     | -0.08 | -0.26 |
| oleoyl-oleoyl-glycerol (18:1/18:1) [1]*                | Diacylglycerol                                                | -0.08 | 0.44  |
| arachidonate (20:4n6)                                  | Polyunsaturated Fatty Acid (n3 and n6)                        | -0.08 | -0.11 |
| N-acetylproline                                        | Urea cycle; Arginine and Proline Metabolism                   | -0.07 | 0.00  |
| palmitoyl-palmitoyl-glycerol (16:0/16:0) [2]*          | Diacylglycerol                                                | -0.07 | 0.54  |
| 2-hydroxybutyrate/2-hydroxyisobutyrate                 | Methionine, Cysteine, SAM and Taurine Metabolism              | -0.07 | 0.40  |
| 14-HDoHE/17-HDoHE                                      | Fatty Acid, Monohydroxy Fatty Acid Metabolism(Acyl Carnitine) | -0.07 | 0.25  |
| palmitoylcarnitine (C16)                               | Fatty Acid Metabolism(Acyl Carnitine)                         | -0.07 | 0.05  |
| 16a-hydroxy DHEA 3-sulfate                             | Steroid                                                       | -0.07 | -0.22 |
| 2-hydroxypalmitate                                     | Fatty Acid, Monohydroxy                                       | -0.07 | 0.11  |
| glycerophosphoinositol*                                | Phospholipid Metabolism                                       | -0.07 | 0.00  |
| 3-hydroxyisobutyrate                                   | Leucine, Isoleucine and Valine Metabolism                     | -0.07 | -0.20 |
| laurylcarnitine (C12)                                  | Fatty Acid Metabolism(Acyl Carnitine)                         | -0.06 | 0.31  |
| 2-hydroxylaurate                                       | Fatty Acid, Monohydroxy                                       | -0.06 | -0.06 |
| 1-(1-enyl-palmitoyl)-2-palmitoleoyl-GPC (P-16:0/16:1)* | Plasmalogen                                                   | -0.06 | 0.01  |
| linoleoyl-linoleoyl-glycerol (18:2/18:2) [1]*          | Diacylglycerol                                                | -0.06 | 0.03  |
| tauroolithocholate 3-sulfate                           | Secondary Bile Acid Metabolism                                | -0.06 | 0.05  |
| 2-hydroxyphenylacetate                                 | Phenylalanine and Tyrosine Metabolism                         | -0.06 | 0.38  |

|                                                     |                                                  |       |       |
|-----------------------------------------------------|--------------------------------------------------|-------|-------|
| cis-4-decenoylcarnitine (C10:1)                     | Fatty Acid Metabolism(Acyl Carnitine)            | -0.06 | 0.22  |
| palmitoyl-linoleoyl-glycerol (16:0/18:2) [2]*       | Diacylglycerol                                   | -0.06 | 0.53  |
| sphingomyelin (d18:1/20:0, d16:1/22:0)*             | Sphingolipid Metabolism                          | -0.06 | 0.33  |
| lactosyl-N-palmitoyl-sphingosine (d18:1/16:0)       | Sphingolipid Metabolism                          | -0.06 | 0.05  |
| dehydroisoandrosterone sulfate (DHEA-S)             | Steroid                                          | -0.06 | -0.29 |
| ethylmalonate                                       | Leucine, Isoleucine and Valine Metabolism        | -0.06 | 0.18  |
| 2-aminobutyrate                                     | Methionine, Cysteine, SAM and Taurine Metabolism | -0.05 | 0.33  |
| phytanate                                           | Food Component/Plant                             | -0.05 | 0.03  |
| 1-palmitoyl-2-oleoyl-GPE (16:0/18:1)                | Phospholipid Metabolism                          | -0.05 | 0.41  |
| ursodeoxycholate                                    | Secondary Bile Acid Metabolism                   | -0.05 | 0.21  |
| eicosapentaenoate (EPA; 20:5n3)                     | Polyunsaturated Fatty Acid (n3 and n6)           | -0.05 | 0.19  |
| serotonin                                           | Tryptophan Metabolism                            | -0.05 | -0.17 |
| theanine                                            | Food Component/Plant                             | -0.05 | 0.54  |
| 1-stearoyl-2-linoleoyl-GPE (18:0/18:2)*             | Phospholipid Metabolism                          | -0.05 | 0.43  |
| 10-undecenoate (11:1n1)                             | Medium Chain Fatty Acid                          | -0.05 | 0.08  |
| palmitate (16:0)                                    | Long Chain Fatty Acid                            | -0.05 | 0.23  |
| 1-(1-enyl-stearoyl)-2-linoleoyl-GPE (P-18:0/18:2)*  | Plasmalogen                                      | -0.04 | 0.51  |
| 3-hydroxyoctanoate                                  | Fatty Acid, Monohydroxy                          | -0.04 | 0.59  |
| margarate (17:0)                                    | Long Chain Fatty Acid                            | -0.04 | 0.28  |
| hexanoylcarnitine (C6)                              | Fatty Acid Metabolism(Acyl Carnitine)            | -0.04 | 0.51  |
| 1-oleoyl-GPC (18:1)                                 | Lysolipid                                        | -0.04 | -0.09 |
| 10-heptadecenoate (17:1n7)                          | Long Chain Fatty Acid                            | -0.04 | 0.25  |
| sphinganine                                         | Sphingolipid Metabolism                          | -0.04 | -0.19 |
| linolenoylcarnitine (C18:3)*                        | Fatty Acid Metabolism(Acyl Carnitine)            | -0.04 | -0.08 |
| vanillylmandelate (VMA)                             | Phenylalanine and Tyrosine Metabolism            | -0.04 | 0.04  |
| isoleucine                                          | Leucine, Isoleucine and Valine Metabolism        | -0.04 | -0.17 |
| gamma-glutamylglycine                               | Gamma-glutamyl Amino Acid                        | -0.03 | -0.30 |
| palmitoyl-docosahexaenoyl-glycerol (16:0/22:6) [1]* | Diacylglycerol                                   | -0.03 | 0.38  |
| beta-cryptoxanthin                                  | Food Component/Plant                             | -0.03 | 0.15  |
| dodecanedioate                                      | Fatty Acid, Dicarboxylate                        | -0.03 | 0.07  |
| sphingomyelin (d18:1/21:0, d17:1/22:0, d16:1/23:0)* | Sphingolipid Metabolism                          | -0.02 | 0.37  |
| 2,3-dihydroxyisovalerate                            | Food Component/Plant                             | -0.02 | -0.22 |
| 4-imidazoleacetate                                  | Histidine Metabolism                             | -0.02 | -0.04 |
| oleoyl-linoleoyl-glycerol (18:1/18:2) [2]           | Diacylglycerol                                   | -0.02 | 0.30  |
| palmitoleoyl-arachidonoyl-glycerol (16:1/20:4) [2]* | Diacylglycerol                                   | -0.02 | 0.13  |

|                                                   |                                                               |       |       |
|---------------------------------------------------|---------------------------------------------------------------|-------|-------|
| arginine                                          | Urea cycle; Arginine and Proline Metabolism                   | -0.02 | 0.11  |
| 2-linoleoylglycerol (18:2)                        | Monoacylglycerol                                              | -0.02 | -0.53 |
| sphingomyelin (d18:2/24:1, d18:1/24:2)*           | Sphingolipid Metabolism                                       | -0.02 | -0.14 |
| palmitoyl-linoleoyl-glycerol (16:0/18:2) [1]*     | Diacylglycerol                                                | -0.02 | 0.47  |
| pregnenolone sulfate                              | Steroid                                                       | -0.02 | -0.27 |
| 1-palmitoyl-2-alpha-linolenoyl-GPC (16:0/18:3n3)* | Phospholipid Metabolism Fatty Acid Metabolism(Acyl Carnitine) | -0.02 | 0.19  |
| 3-hydroxybutyrylcarnitine (1)                     | Carnitine)                                                    | -0.02 | 0.52  |
| 1-(1-enyl-stearoyl)-2-oleoyl-GPE (P-18:0/18:1)    | Plasmalogen Phenylalanine and Tyrosine Metabolism             | -0.01 | 0.51  |
| phenylpyruvate                                    | Metabolism                                                    | -0.01 | -0.24 |
| 3-methylhistidine                                 | Histidine Metabolism                                          | -0.01 | 0.20  |
| stearoyl-arachidonoyl-glycerol (18:0/20:4) [1]*   | Diacylglycerol                                                | -0.01 | 0.50  |
| caprate (10:0)                                    | Medium Chain Fatty Acid                                       | -0.01 | 0.49  |
| oleoyl-linoleoyl-glycerol (18:1/18:2) [1]         | Diacylglycerol                                                | -0.01 | 0.28  |
| N-acetylkynurenine (2)                            | Tryptophan Metabolism                                         | -0.01 | 0.09  |
| 1-palmitoyl-2-arachidonoyl-GPC (16:0/20:4n6)      | Phospholipid Metabolism                                       | -0.01 | 0.02  |
| palmitoyl-arachidonoyl-glycerol (16:0/20:4) [1]*  | Diacylglycerol                                                | 0.00  | 0.48  |
| 21-hydroxypregnenolone disulfate                  | Steroid                                                       | 0.00  | -0.20 |
| umbelliferone sulfate                             | Food Component/Plant                                          | 0.00  | 0.01  |

**Supplementary Table 5.** Pearson correlation coefficient between IL-1ra and all measured metabolites in the Null condition for both LTBI and TB.

|                        |
|------------------------|
| TNF $\alpha$ signature |
| C3                     |
| CCL4                   |
| CD44                   |
| CD83                   |
| IRAK2                  |
| NFKB1                  |
| NFKB2                  |
| NFKBIA                 |
| NFKBIZ                 |
| POU2F2                 |
| RELB                   |
| SOCS3                  |
| SRC                    |
| TNFAIP3                |

**Supplementary Table 6.** Unique cytokine-induced gene signature derived from TNF single cytokine stimulation as previously described<sup>15</sup>.

| <b>Gene</b> | <b>p-value</b> | <b>q-value</b> | <b>Fold change</b> |
|-------------|----------------|----------------|--------------------|
| IL1A        | 3.43E-31       | 2.09E-28       | 212.311701         |
| CCL20       | 3.54E-29       | 7.20E-27       | 300.568543         |
| IL6         | 2.95E-29       | 7.20E-27       | 136.070461         |
| IL1B        | 1.39E-28       | 2.13E-26       | 84.2357019         |
| CCL19       | 4.53E-25       | 5.52E-23       | 23.7958806         |
| IL10        | 2.52E-24       | 2.56E-22       | 22.4348548         |
| CCL2        | 4.46E-22       | 3.89E-20       | 69.4070409         |
| CXCL2       | 6.80E-21       | 5.19E-19       | 17.6122855         |
| CXCL1       | 5.58E-20       | 3.78E-18       | 7.24472043         |
| C3          | 2.52E-19       | 1.54E-17       | 25.3160454         |
| CCL3        | 3.31E-19       | 1.84E-17       | 12.3458144         |
| BATF3       | 7.24E-18       | 3.68E-16       | 10.3338066         |
| CCL4        | 8.44E-18       | 3.96E-16       | 5.72422376         |
| LILRB1      | 1.10E-16       | 4.80E-15       | 3.90816135         |
| SOCS3       | 9.14E-16       | 3.72E-14       | 5.15177685         |
| BATF        | 2.88E-15       | 1.10E-13       | 3.41543669         |
| ADA         | 5.79E-14       | 1.96E-12       | 2.7834998          |
| CD80        | 5.78E-14       | 1.96E-12       | 4.43455667         |
| TNFSF15     | 1.98E-13       | 6.36E-12       | 16.4780084         |
| SELPLG      | 2.90E-13       | 8.86E-12       | 0.37229031         |
| IRAK2       | 5.89E-13       | 1.71E-11       | 6.46316131         |
| LAMP3       | 8.68E-13       | 2.41E-11       | 5.92884047         |
| PTGS2       | 1.04E-12       | 2.76E-11       | 14.6649475         |
| LAIR1       | 2.07E-12       | 5.25E-11       | 2.13989502         |
| POU2F2      | 3.79E-12       | 9.24E-11       | 2.26164102         |
| CD1D        | 1.04E-11       | 2.45E-10       | 0.2482714          |
| TNFAIP6     | 1.12E-11       | 2.53E-10       | 4.95347156         |
| CCL22       | 1.36E-11       | 2.96E-10       | 7.0972002          |
| NFKBIZ      | 1.47E-11       | 3.10E-10       | 3.13342401         |
| NFKB1       | 1.78E-11       | 3.61E-10       | 3.07008809         |
| EBI3        | 2.23E-11       | 4.39E-10       | 2.84525892         |
| LILRB4      | 2.58E-11       | 4.91E-10       | 4.50950805         |
| TNFRSF9     | 4.24E-11       | 7.84E-10       | 4.03643003         |
| SRC         | 8.78E-11       | 1.57E-09       | 4.238783           |
| MSR1        | 9.04E-11       | 1.58E-09       | 0.24770417         |
| LILRA3      | 2.29E-10       | 3.87E-09       | 2.91298853         |
| SLAMF7      | 4.28E-10       | 7.05E-09       | 2.76580607         |
| CD40LG      | 1.66E-09       | 2.66E-08       | 0.57192069         |
| TNF         | 4.27E-09       | 6.69E-08       | 2.29017836         |
| FCER1A      | 5.09E-09       | 7.76E-08       | 0.23207131         |
| CD14        | 5.23E-09       | 7.77E-08       | 2.14369557         |
| CLEC5A      | 6.73E-09       | 9.55E-08       | 4.81805219         |

|          |          |            |            |
|----------|----------|------------|------------|
| TRAF1    | 6.62E-09 | 9.55E-08   | 2.03390181 |
| CCR2     | 7.78E-09 | 1.08E-07   | 0.33110713 |
| IL2RA    | 7.98E-09 | 1.08E-07   | 4.1747798  |
| CCL7     | 1.22E-08 | 1.62E-07   | 5.64608199 |
| DUSP4    | 1.39E-08 | 1.81E-07   | 4.29974158 |
| IL23A    | 2.00E-08 | 2.54E-07   | 4.27694314 |
| NFKBIA   | 2.07E-08 | 2.58E-07   | 2.57754936 |
| IL8      | 2.14E-08 | 2.62E-07   | 3.44525325 |
| AHR      | 2.74E-08 | 3.27E-07   | 1.55085627 |
| ALDH1A1  | 5.11E-08 | 5.99E-07   | 0.31581903 |
| ICAM5    | 9.11E-08 | 1.05E-06   | 3.73567785 |
| CXCL13   | 1.22E-07 | 1.35E-06   | 2.24874481 |
| IRAK3    | 1.22E-07 | 1.35E-06   | 2.88747799 |
| CD274    | 1.64E-07 | 1.79E-06   | 6.21347375 |
| CDKN1A   | 1.67E-07 | 1.79E-06   | 3.60580151 |
| PDCD1LG2 | 4.50E-07 | 4.74E-06   | 3.24891949 |
| KCNJ2    | 7.52E-07 | 7.78E-06   | 3.48865275 |
| CASP8    | 9.28E-07 | 9.44E-06   | 0.60129254 |
| PLAU     | 1.04E-06 | 1.04E-05   | 7.67171924 |
| RELB     | 1.72E-06 | 1.70E-05   | 2.1874802  |
| CCRL2    | 1.86E-06 | 1.78E-05   | 3.64517996 |
| CD40     | 1.87E-06 | 1.78E-05   | 2.21657161 |
| TNFAIP3  | 2.13E-06 | 2.00E-05   | 2.01128837 |
| TNFRSF4  | 2.23E-06 | 2.06E-05   | 2.53379536 |
| TNFSF12  | 3.45E-06 | 3.14E-05   | 0.82198616 |
| CASP2    | 3.94E-06 | 3.53E-05   | 0.77089325 |
| CD46     | 4.33E-06 | 3.82E-05   | 0.60245566 |
| IL7R     | 5.78E-06 | 4.96E-05   | 0.72868945 |
| NFATC3   | 5.78E-06 | 4.96E-05   | 0.72909413 |
| HLA.DMB  | 5.86E-06 | 4.97E-05   | 0.72039147 |
| ICAM1    | 6.12E-06 | 5.11E-05   | 2.35325886 |
| JAK3     | 6.48E-06 | 5.34E-05   | 1.63910012 |
| IL16     | 6.67E-06 | 5.42E-05   | 0.68323606 |
| MARCO    | 7.47E-06 | 6.00E-05   | 5.50605871 |
| CSF3R    | 7.69E-06 | 6.09E-05   | 0.51794721 |
| SELL     | 8.03E-06 | 6.28E-05   | 0.6690134  |
| PYCARD   | 9.99E-06 | 7.72E-05   | 0.5088453  |
| BID      | 1.18E-05 | 8.99E-05   | 2.97096169 |
| S1PR1    | 1.59E-05 | 0.00011975 | 0.69552438 |
| ITGA4    | 1.81E-05 | 0.00013479 | 0.76409875 |
| IDO1     | 1.85E-05 | 0.00013584 | 2.51373061 |
| CXCR2    | 2.25E-05 | 0.00016354 | 0.52178957 |
| LILRA1   | 2.45E-05 | 0.00017617 | 2.45722501 |

|         |            |            |            |
|---------|------------|------------|------------|
| IKBKE   | 2.63E-05   | 0.0001865  | 1.53738768 |
| CYB561  | 3.04E-05   | 0.00021345 | 0.66560952 |
| KLF2    | 3.60E-05   | 0.00024923 | 0.66820886 |
| TICAM1  | 4.13E-05   | 0.00028295 | 1.97800218 |
| CCL23   | 4.35E-05   | 0.00029163 | 2.11730627 |
| CYBB    | 4.35E-05   | 0.00029163 | 1.4926294  |
| IL1RN   | 4.83E-05   | 0.00031993 | 3.74745204 |
| NFKB2   | 4.89E-05   | 0.00032091 | 1.91395377 |
| CD36    | 5.50E-05   | 0.00035679 | 0.58312416 |
| ATG7    | 5.86E-05   | 0.00037657 | 1.87104598 |
| SELE    | 6.10E-05   | 0.00038737 | 1.53308961 |
| FER1L3  | 6.28E-05   | 0.00039472 | 2.6818528  |
| CTSS    | 7.77E-05   | 0.0004836  | 0.64444716 |
| CD83    | 8.07E-05   | 0.0004923  | 1.86846557 |
| IFIT2   | 8.07E-05   | 0.0004923  | 0.45531283 |
| CISH    | 9.29E-05   | 0.00056106 | 2.81329332 |
| GAS6    | 9.50E-05   | 0.00056824 | 1.47604225 |
| CD244   | 0.00010707 | 0.0006341  | 0.72778338 |
| BCL3    | 0.00012504 | 0.00073339 | 2.07021415 |
| HLA.DMA | 0.00012737 | 0.00073998 | 0.72211274 |
| CCND3   | 0.00014055 | 0.00080884 | 0.77631712 |
| SIGIRR  | 0.00017294 | 0.00098592 | 0.78599771 |
| CASP10  | 0.00019282 | 0.00108908 | 1.85097323 |
| LTB4R2  | 0.00019467 | 0.00108943 | 0.63438784 |
| CLEC7A  | 0.00022668 | 0.00125702 | 0.6194544  |
| TNFSF10 | 0.00029406 | 0.00161602 | 0.61687154 |
| CCL18   | 0.00029984 | 0.00163304 | 1.43183676 |
| PTAFR   | 0.00031731 | 0.00171291 | 1.62913479 |
| CD82    | 0.00036271 | 0.00194083 | 1.80731    |
| IL23R   | 0.00036593 | 0.00194101 | 2.08019679 |
| CFD     | 0.00039919 | 0.00209919 | 0.41915334 |
| ITGAL   | 0.00051134 | 0.00266596 | 0.71677539 |
| CD96    | 0.00061903 | 0.00320007 | 0.78448023 |
| ICOSLG  | 0.00065448 | 0.00335488 | 1.8685809  |
| SPP1    | 0.00066704 | 0.00339079 | 5.24273659 |
| CARD9   | 0.00071088 | 0.00358379 | 1.89067577 |
| CXCL10  | 0.00071791 | 0.00358957 | 2.13308281 |
| HPSE    | 0.00073118 | 0.00362619 | 2.09786235 |
| HAVCR2  | 0.00075553 | 0.00367935 | 1.96191698 |
| TGFBR2  | 0.00075583 | 0.00367935 | 0.72573864 |
| VAMP5   | 0.00076    | 0.00367935 | 0.75889806 |
| LCK     | 0.00079416 | 0.00381445 | 0.87109985 |
| CD27    | 0.00085273 | 0.00406377 | 0.75457751 |

|          |            |            |            |
|----------|------------|------------|------------|
| FCGRT    | 0.00089073 | 0.00421198 | 0.73925756 |
| SOCS1    | 0.0009399  | 0.00441031 | 2.00084581 |
| CD3E     | 0.00129682 | 0.00603863 | 0.77590935 |
| LAG3     | 0.00140841 | 0.00650856 | 1.90832121 |
| PECAM1   | 0.00150262 | 0.00689172 | 0.71562813 |
| LHFPL2   | 0.00152647 | 0.00694886 | 2.37025136 |
| KLRK1    | 0.0015997  | 0.00722827 | 0.81133409 |
| CD22     | 0.00177202 | 0.00794803 | 2.39445935 |
| ICAM3    | 0.0019465  | 0.0086669  | 0.74639282 |
| IL1R2    | 0.00200718 | 0.00887232 | 1.76261942 |
| CSF2     | 0.00229442 | 0.01006904 | 1.22930763 |
| CCL5     | 0.0026367  | 0.01148848 | 0.74536035 |
| CLEC6A   | 0.00274293 | 0.0118462  | 2.10609416 |
| KLRB1    | 0.00275764 | 0.0118462  | 0.78962194 |
| IGF2R    | 0.00297059 | 0.01267175 | 0.75002209 |
| CD4      | 0.00300011 | 0.0127088  | 0.82125491 |
| ABCB1    | 0.00307494 | 0.01293595 | 0.8313858  |
| POLR1B   | 0.00319791 | 0.01336113 | 1.8567145  |
| IL1R1    | 0.00324724 | 0.01341943 | 2.66620929 |
| TLR2     | 0.00327786 | 0.01341943 | 1.55679825 |
| sCTLA4   | 0.00327617 | 0.01341943 | 1.97778007 |
| CD163    | 0.00335888 | 0.01365945 | 1.57298181 |
| TLR9     | 0.00363583 | 0.01468779 | 0.56050961 |
| IRF8     | 0.00368463 | 0.014787   | 0.7829239  |
| FCAR     | 0.00385377 | 0.0153647  | 1.38541194 |
| C1QB     | 0.00416485 | 0.01628563 | 1.7231377  |
| IFNA1.13 | 0.00415787 | 0.01628563 | 1.22245725 |
| MBP      | 0.0041368  | 0.01628563 | 0.79074532 |
| CD247    | 0.00429836 | 0.01659493 | 0.85589517 |
| ICAM2    | 0.00427783 | 0.01659493 | 0.89108688 |
| STAT6    | 0.00442326 | 0.01696974 | 0.70405303 |
| ETS1     | 0.00461676 | 0.0176014  | 0.82120368 |
| TRAF3    | 0.00468297 | 0.01774293 | 1.44733713 |
| ZAP70    | 0.00475    | 0.0178858  | 0.81264434 |
| GZMA     | 0.00484075 | 0.01800523 | 0.75953587 |
| PSMB10   | 0.00481794 | 0.01800523 | 0.84883497 |
| TCF7     | 0.00524422 | 0.01938772 | 0.80390393 |
| IFNG     | 0.00571594 | 0.02075431 | 1.21169367 |
| NLRP3    | 0.00565143 | 0.02075431 | 1.64264762 |
| TNFSF8   | 0.00570429 | 0.02075431 | 1.46439223 |
| CD5      | 0.00575757 | 0.02075554 | 0.82957309 |
| ITGA6    | 0.00578433 | 0.02075554 | 1.18908924 |
| FYN      | 0.00603091 | 0.02151377 | 0.7897243  |



|          |            |            |            |
|----------|------------|------------|------------|
| MAP4K1   | 0.00640358 | 0.02244933 | 0.85128965 |
| MAPK11   | 0.00638657 | 0.02244933 | 0.57492036 |
| SH2D1A   | 0.00634492 | 0.02244933 | 0.82758476 |
| TBX21    | 0.00649259 | 0.02263131 | 0.81782609 |
| FCGR3A.B | 0.00655248 | 0.02271103 | 0.65242591 |
| PLAUR    | 0.00673515 | 0.02321153 | 1.90470689 |
| IFNAR2   | 0.00679705 | 0.02329326 | 0.73547948 |
| TRAF2    | 0.00737003 | 0.02511574 | 1.71960001 |
| CXCR3    | 0.0075181  | 0.02537897 | 0.81245398 |
| IL17F    | 0.00753048 | 0.02537897 | 1.10094317 |
| NCF4     | 0.00771893 | 0.02587114 | 0.73172274 |
| ENTPD1   | 0.00797935 | 0.02659783 | 0.66945316 |
| NOTCH1   | 0.0080744  | 0.02676839 | 0.76211732 |
| LEF1     | 0.00879035 | 0.0289844  | 0.89700691 |
| CSF2RB   | 0.00902795 | 0.02950632 | 1.40375874 |
| CXCL9    | 0.00909375 | 0.02950632 | 1.33990527 |
| MAP4K2   | 0.00906815 | 0.02950632 | 0.82301292 |
| CCR7     | 0.00931243 | 0.03005599 | 1.25983431 |
| CD9      | 0.0103004  | 0.03306971 | 0.58875487 |
| GBP2     | 0.0105318  | 0.03363559 | 0.69579201 |
| IL12RB1  | 0.011472   | 0.0364475  | 0.60897927 |
| SMAD3    | 0.0117892  | 0.0372612  | 1.28071991 |
| ARHGDIB  | 0.0120456  | 0.03787534 | 0.85433097 |
| TRAFD1   | 0.0121496  | 0.03800644 | 0.74259937 |
| PML      | 0.0123071  | 0.03830271 | 0.76551789 |
| LTBR     | 0.012402   | 0.03840213 | 2.00848815 |
| IL6R     | 0.0125199  | 0.03857141 | 0.75910587 |
| CD209    | 0.0132276  | 0.04053603 | 1.37714933 |
| FCER1G   | 0.0132905  | 0.04053603 | 1.49507825 |
| IL12B    | 0.0136527  | 0.04143357 | 1.22335744 |
| MAPK1    | 0.0137494  | 0.04152047 | 0.80608116 |
| HLA.C    | 0.0138663  | 0.04166721 | 0.71163926 |
| KREMEN1  | 0.0142776  | 0.04269282 | 2.14163102 |
| NFATC2   | 0.014464   | 0.04303922 | 0.80822451 |
| PPBP     | 0.0147094  | 0.04355696 | 0.75049637 |
| CXCR1    | 0.0154676  | 0.04558085 | 0.67646679 |
| SDHA     | 0.015728   | 0.04612538 | 0.87478234 |
| ARG2     | 0.0158037  | 0.04612563 | 1.61150088 |
| ABL1     | 0.0171857  | 0.04992037 | 0.82545473 |
| CD99     | 0.0179527  | 0.05190117 | 0.8267941  |
| MR1      | 0.0181272  | 0.05215845 | 1.67273741 |
| CCR1     | 0.0182493  | 0.05226325 | 1.67253452 |
| CD28     | 0.0189324  | 0.05371518 | 0.86730721 |

|           |           |            |            |
|-----------|-----------|------------|------------|
| NOD1      | 0.0189039 | 0.05371518 | 0.71072877 |
| TRAF4     | 0.0194128 | 0.05482319 | 1.80643831 |
| IL21R     | 0.0195709 | 0.05501497 | 1.58548255 |
| BCL2L11   | 0.0206973 | 0.05791446 | 0.88999183 |
| CTLA4.TM  | 0.0214969 | 0.05987721 | 1.80442979 |
| CD44      | 0.0219813 | 0.06091361 | 1.29736012 |
| FAS       | 0.0220687 | 0.06091361 | 0.71111214 |
| BCL2      | 0.0225096 | 0.0618507  | 0.91879697 |
| CLEC4A    | 0.0228753 | 0.06257369 | 1.44631318 |
| DEFB1     | 0.0236658 | 0.06416061 | 0.82098571 |
| TRAF5     | 0.0236122 | 0.06416061 | 0.9492829  |
| PAX5      | 0.0245032 | 0.0658456  | 0.60878469 |
| Sep-04    | 0.024423  | 0.0658456  | 0.57727473 |
| CD79B     | 0.025349  | 0.06781969 | 0.7502774  |
| DEFA1     | 0.0261553 | 0.06967132 | 0.68171377 |
| ICOS      | 0.02676   | 0.07066494 | 1.54661702 |
| KLRC2     | 0.026656  | 0.07066494 | 0.86731502 |
| IL32      | 0.0280509 | 0.07343798 | 0.67748363 |
| JAK2      | 0.0280509 | 0.07343798 | 0.79497257 |
| CCR10     | 0.0285155 | 0.07433528 | 0.89192358 |
| JAK1      | 0.0289307 | 0.0747785  | 0.82202888 |
| RARRES3   | 0.0289307 | 0.0747785  | 0.94118589 |
| CD3D      | 0.0298342 | 0.07675927 | 0.84863318 |
| TNFRSF10C | 0.0299487 | 0.07675927 | 0.75268911 |
| BTLA      | 0.030411  | 0.07761803 | 0.87786804 |
| HLA.DPB1  | 0.031956  | 0.0812215  | 0.81986655 |
| TNFRSF8   | 0.0342048 | 0.08657646 | 1.70489041 |
| LILRA2    | 0.0349853 | 0.08818609 | 0.82799503 |
| CRADD     | 0.0358408 | 0.08997073 | 1.62697492 |
| PDCD2     | 0.0361369 | 0.08997351 | 0.79849596 |
| SMARCD3   | 0.0359919 | 0.08997351 | 0.58801709 |
| MS4A1     | 0.0370005 | 0.09174921 | 0.83399636 |
| XCR1      | 0.0371854 | 0.09183439 | 0.81753477 |
| CEBPB     | 0.0376939 | 0.09271483 | 1.36084524 |
| CD74      | 0.0388263 | 0.09511664 | 0.82851689 |
| LTB4R     | 0.0401344 | 0.09792794 | 0.79819602 |
| CREB5     | 0.0419357 | 0.10191545 | 0.70124622 |
| CD276     | 0.0431552 | 0.10405009 | 1.59065727 |
| IL28A.B   | 0.0430355 | 0.10405009 | 0.94951237 |
| SLC2A1    | 0.0448919 | 0.10781126 | 1.70450996 |
| IL13RA1   | 0.0455834 | 0.10904264 | 0.82272604 |
| SMAD5     | 0.0464061 | 0.11057704 | 1.05105911 |
| CLEC4E    | 0.0472501 | 0.11215004 | 1.35900616 |

|           |           |            |            |
|-----------|-----------|------------|------------|
| NT5E      | 0.048583  | 0.11486678 | 1.67988098 |
| TLR1      | 0.048968  | 0.11533004 | 0.80880735 |
| IRF1      | 0.0500236 | 0.11736306 | 0.78108095 |
| CX3CR1    | 0.0509164 | 0.11900002 | 0.79734942 |
| CCL8      | 0.0512057 | 0.11921938 | 1.76455938 |
| KIT       | 0.0518135 | 0.1201758  | 0.80363649 |
| SLAMF6    | 0.0528695 | 0.12216059 | 0.81562393 |
| BTK       | 0.0540587 | 0.12435033 | 0.84838205 |
| KLRG2     | 0.0542249 | 0.12435033 | 0.86862598 |
| IRF3      | 0.0561793 | 0.12787079 | 0.73040776 |
| KLRG1     | 0.056164  | 0.12787079 | 0.70173295 |
| CD58      | 0.057559  | 0.13052413 | 1.23379696 |
| PTK2      | 0.0583616 | 0.13185399 | 0.83897981 |
| IFNAR1    | 0.0597879 | 0.13457793 | 1.34815558 |
| APOL6     | 0.0612457 | 0.13735249 | 0.79885911 |
| HLA.A     | 0.0616672 | 0.13779118 | 0.83238104 |
| CD55      | 0.0624808 | 0.13909959 | 0.69885206 |
| CSF1R     | 0.0630671 | 0.13938743 | 1.65715666 |
| STAT5B    | 0.062946  | 0.13938743 | 0.82923964 |
| MME       | 0.0633755 | 0.13956338 | 0.66101871 |
| GBP5      | 0.0655693 | 0.14387508 | 0.70290566 |
| CD24      | 0.0669112 | 0.1457778  | 0.88280579 |
| PSMB8     | 0.0669144 | 0.1457778  | 0.84504379 |
| PSMB5     | 0.0682731 | 0.14820851 | 1.58611787 |
| PSMB9     | 0.0701414 | 0.1517243  | 0.81242357 |
| TNFRSF13C | 0.0730081 | 0.15736728 | 0.88096707 |
| CAMP      | 0.073963  | 0.15886419 | 0.688927   |
| STAT2     | 0.0769787 | 0.16476143 | 0.86756094 |
| CASP1     | 0.0805956 | 0.17070638 | 1.23722937 |
| TLR8      | 0.0800706 | 0.17070638 | 0.75788192 |
| TMEM173   | 0.0805958 | 0.17070638 | 0.94737703 |
| IKBKAP    | 0.0810036 | 0.17097646 | 0.94802598 |
| ATM       | 0.0819438 | 0.17236454 | 0.71593722 |
| GBP4      | 0.0838049 | 0.1756735  | 0.80465764 |
| CEACAM1   | 0.0841446 | 0.17578153 | 1.64022532 |
| KLRF2     | 0.0844598 | 0.17583781 | 1.07387644 |
| C4A.B     | 0.0850947 | 0.17655703 | 0.66902777 |
| IL10RA    | 0.0879606 | 0.18188463 | 0.86882228 |
| APOL1     | 0.0916957 | 0.18644833 | 0.87767821 |
| CD79A     | 0.0911131 | 0.18644833 | 0.85576525 |
| CD81      | 0.0916959 | 0.18644833 | 1.23170093 |
| KLRC4     | 0.0916545 | 0.18644833 | 0.82044073 |
| LILRB2    | 0.0911131 | 0.18644833 | 1.30401729 |

|           |           |            |            |
|-----------|-----------|------------|------------|
| NCAM1     | 0.0922502 | 0.18695223 | 0.75256442 |
| ETV7      | 0.0992554 | 0.20048276 | 0.63763115 |
| CD45RB    | 0.103348  | 0.20806033 | 1.15826792 |
| BCL6      | 0.106602  | 0.21390533 | 1.33763732 |
| RAF1      | 0.109264  | 0.21781386 | 0.82334329 |
| TIGIT     | 0.109264  | 0.21781386 | 0.89377029 |
| ITGB2     | 0.111978  | 0.222497   | 0.83965874 |
| TGFB1     | 0.113355  | 0.22450179 | 0.82002967 |
| IL6ST     | 0.114396  | 0.22583029 | 1.15947925 |
| CTNNB1    | 0.115445  | 0.22716597 | 1.15382306 |
| IL1RL1    | 0.118917  | 0.23259965 | 1.51005487 |
| TNFSF13B  | 0.118969  | 0.23259965 | 0.98631139 |
| MALT1     | 0.124109  | 0.24187377 | 0.91407852 |
| PRF1      | 0.126352  | 0.24546089 | 0.84738765 |
| CD53      | 0.128627  | 0.24908721 | 1.24482765 |
| CMKLR1    | 0.131754  | 0.25419681 | 0.69474287 |
| HLA.DRA   | 0.132099  | 0.25419681 | 1.13061755 |
| C14orf166 | 0.135246  | 0.25943415 | 0.90161911 |
| PSMC2     | 0.137242  | 0.26243768 | 1.21821942 |
| IL7       | 0.139108  | 0.26517462 | 0.88131948 |
| HLA.B     | 0.139667  | 0.26541081 | 0.84691847 |
| AIRE      | 0.14086   | 0.26684658 | 0.93640828 |
| CD6       | 0.142125  | 0.26758102 | 0.90415812 |
| MIF       | 0.142125  | 0.26758102 | 1.34301833 |
| CCR5      | 0.143762  | 0.26941043 | 1.23552826 |
| LIF       | 0.14398   | 0.26941043 | 1.81056879 |
| IFITM1    | 0.148414  | 0.27601384 | 1.18226054 |
| IRAK1     | 0.147986  | 0.27601384 | 1.43674796 |
| DUSP3     | 0.150558  | 0.27915009 | 1.30344798 |
| DEFB4A    | 0.156091  | 0.28593246 | 0.96618583 |
| IL20      | 0.156091  | 0.28593246 | 0.97400494 |
| RAG1      | 0.156091  | 0.28593246 | 0.97013566 |
| THY1      | 0.156091  | 0.28593246 | 0.97783239 |
| AICDA     | 0.160932  | 0.29079776 | 1.05879288 |
| CXCL11    | 0.160932  | 0.29079776 | 1.06059173 |
| FOXP3     | 0.162055  | 0.29079776 | 1.07763529 |
| IRGM      | 0.159769  | 0.29079776 | 1.02710324 |
| ITGAE     | 0.162031  | 0.29079776 | 0.98535241 |
| NCR1      | 0.162084  | 0.29079776 | 0.89954789 |
| SKI       | 0.160269  | 0.29079776 | 0.93711201 |
| CD8B      | 0.164511  | 0.29428654 | 0.92099741 |
| CD19      | 0.169493  | 0.29969919 | 0.74935642 |
| CR1       | 0.168561  | 0.29969919 | 0.87422952 |

|           |          |            |            |
|-----------|----------|------------|------------|
| HLA.DPA1  | 0.169502 | 0.29969919 | 0.87315519 |
| IKBKG     | 0.168561 | 0.29969919 | 0.94193082 |
| VTN       | 0.170707 | 0.30095743 | 0.92160854 |
| SCARF1    | 0.171381 | 0.30127496 | 1.45139378 |
| TOLLIP    | 0.174265 | 0.30546451 | 0.94469799 |
| ITLN1     | 0.176005 | 0.30763052 | 1.1476884  |
| GNLY      | 0.179619 | 0.31305026 | 0.88972414 |
| EGR2      | 0.180875 | 0.31434117 | 1.44450382 |
| PDCD1     | 0.186736 | 0.323605   | 0.84438391 |
| EDNRB     | 0.188065 | 0.32498484 | 1.34089848 |
| S100A8    | 0.190179 | 0.32770958 | 1.18120961 |
| CSF1      | 0.193623 | 0.33270431 | 0.87894208 |
| PPIA      | 0.199035 | 0.34103272 | 1.25074439 |
| STAT1     | 0.199588 | 0.34103272 | 0.82554514 |
| IL4R      | 0.203877 | 0.34738818 | 1.23528163 |
| FKBP5     | 0.20496  | 0.34821003 | 0.88890059 |
| GFI1      | 0.205501 | 0.34821003 | 0.94422952 |
| TYK2      | 0.206592 | 0.34908898 | 0.9034715  |
| KLRC3     | 0.209884 | 0.35367193 | 0.8366476  |
| LILRB3    | 0.216018 | 0.36300545 | 0.89537441 |
| FCGR2B    | 0.217147 | 0.36390019 | 0.83392641 |
| CD2       | 0.219988 | 0.36765118 | 0.94258158 |
| TAP2      | 0.221706 | 0.36945722 | 0.88409787 |
| TNFRSF1B  | 0.22228  | 0.36945722 | 1.19749032 |
| TP53      | 0.223432 | 0.37036283 | 1.09566746 |
| BCAP31    | 0.232212 | 0.38272745 | 0.95361954 |
| C8G       | 0.23338  | 0.38272745 | 0.93350594 |
| IL4       | 0.232643 | 0.38272745 | 0.91201408 |
| PRKCD     | 0.233401 | 0.38272745 | 1.25379718 |
| LTF       | 0.23699  | 0.38757078 | 0.79073599 |
| CD3EAP    | 0.24763  | 0.40291069 | 0.95418499 |
| LILRA6    | 0.247691 | 0.40291069 | 1.91359298 |
| CXCR4     | 0.250498 | 0.40639303 | 0.86551876 |
| B2M       | 0.254273 | 0.41033474 | 0.90280042 |
| TNFRSF11A | 0.254201 | 0.41033474 | 0.74298192 |
| STAT4     | 0.264531 | 0.4257623  | 0.93657972 |
| IKZF2     | 0.271007 | 0.43389572 | 1.12282259 |
| RORC      | 0.27048  | 0.43389572 | 0.8406633  |
| ATG5      | 0.278415 | 0.4445894  | 1.34550337 |
| DPP4      | 0.289657 | 0.4613336  | 0.97334206 |
| ATG16L1   | 0.292796 | 0.46511865 | 1.06504958 |
| CXCR6     | 0.295033 | 0.46647775 | 1.43213056 |
| IL13      | 0.295181 | 0.46647775 | 0.85225201 |

|          |          |            |            |
|----------|----------|------------|------------|
| GZMK     | 0.296995 | 0.46813165 | 0.93233091 |
| CD164    | 0.301243 | 0.4723862  | 0.91049185 |
| NOD2     | 0.301243 | 0.4723862  | 1.29559876 |
| IL12A    | 0.307525 | 0.48100064 | 0.97276741 |
| FN1      | 0.310438 | 0.48431504 | 0.82616852 |
| ANKRD22  | 0.31536  | 0.48847726 | 1.38419865 |
| BAX      | 0.317864 | 0.48847726 | 0.94644869 |
| CCBP2    | 0.318713 | 0.48847726 | 1.0254983  |
| CD160    | 0.322005 | 0.48847726 | 0.86480094 |
| CD45RA   | 0.324529 | 0.48847726 | 0.98905825 |
| CD97     | 0.326022 | 0.48847726 | 0.93570684 |
| CEACAM8  | 0.320801 | 0.48847726 | 0.74039445 |
| IL19     | 0.325767 | 0.48847726 | 1.00189353 |
| IL2      | 0.325767 | 0.48847726 | 1.034742   |
| IL22     | 0.325767 | 0.48847726 | 1.0306703  |
| IL26     | 0.320108 | 0.48847726 | 0.98735117 |
| MAPK14   | 0.327519 | 0.48847726 | 0.96051297 |
| MASP2    | 0.325767 | 0.48847726 | 1.00370646 |
| PIGR     | 0.320108 | 0.48847726 | 0.99101555 |
| PLA2G2A  | 0.320108 | 0.48847726 | 0.98075405 |
| RAG2     | 0.320108 | 0.48847726 | 0.99101555 |
| UBE2L3   | 0.32752  | 0.48847726 | 1.00654362 |
| VCAM1    | 0.324406 | 0.48847726 | 1.02351468 |
| TLR3     | 0.329242 | 0.48865601 | 1.0528462  |
| XBP1     | 0.329022 | 0.48865601 | 1.19473529 |
| TIRAP    | 0.330712 | 0.48964641 | 0.84712689 |
| LILRA5   | 0.33204  | 0.49042228 | 1.14940163 |
| CASP4    | 0.335075 | 0.49225094 | 1.1406973  |
| IL1RAP   | 0.335075 | 0.49225094 | 1.19323815 |
| TLR5     | 0.335699 | 0.49225094 | 0.83518517 |
| HLA.DQA1 | 0.34947  | 0.51121511 | 1.12992421 |
| LY96     | 0.360797 | 0.52517369 | 0.90837065 |
| NFATC1   | 0.361595 | 0.52517369 | 0.97400852 |
| TFRC     | 0.361595 | 0.52517369 | 0.94366474 |
| RELA     | 0.3648   | 0.52857007 | 1.20784221 |
| GUSB     | 0.372888 | 0.53784839 | 0.96927289 |
| XCL1     | 0.372967 | 0.53784839 | 1.01761723 |
| C2       | 0.375812 | 0.54067292 | 1.2932077  |
| CHITA    | 0.381735 | 0.547902   | 0.88459194 |
| ITGA2B   | 0.385545 | 0.55207148 | 0.8647416  |
| CFP      | 0.387724 | 0.55259729 | 1.11296868 |
| TAP1     | 0.387724 | 0.55259729 | 0.87414408 |
| GPI      | 0.389394 | 0.55368378 | 1.16969954 |

|           |          |            |            |
|-----------|----------|------------|------------|
| IL18RAP   | 0.391068 | 0.55477088 | 1.16180907 |
| CFB       | 0.396128 | 0.56007461 | 1.02194057 |
| IL28A     | 0.396643 | 0.56007461 | 0.9261495  |
| PDGFB     | 0.398913 | 0.56197905 | 1.07397991 |
| ATG12     | 0.41275  | 0.57893067 | 0.85002784 |
| CCL13     | 0.412844 | 0.57893067 | 1.02274331 |
| GATA3     | 0.417817 | 0.58411339 | 0.88218125 |
| TLR4      | 0.418455 | 0.58411339 | 0.97002504 |
| CEACAM6   | 0.420253 | 0.58528386 | 0.81710138 |
| IL2RG     | 0.423713 | 0.58875838 | 1.15033494 |
| CCR6      | 0.42698  | 0.59194955 | 0.98689219 |
| KLRC1     | 0.428002 | 0.59202091 | 0.99556623 |
| TAGAP     | 0.436131 | 0.60190025 | 0.98777742 |
| MCL1      | 0.437922 | 0.60300772 | 1.12754186 |
| CD70      | 0.442715 | 0.60686775 | 0.89480486 |
| IL11RA    | 0.442156 | 0.60686775 | 0.81014778 |
| CHUK      | 0.446033 | 0.6080529  | 0.91815778 |
| CTSG      | 0.445258 | 0.6080529  | 0.88108677 |
| HRAS      | 0.44657  | 0.6080529  | 1.20391874 |
| SLAMF1    | 0.468797 | 0.6368957  | 1.23558906 |
| TBP       | 0.472742 | 0.63940714 | 1.01935516 |
| TGFBR1    | 0.471807 | 0.63940714 | 0.92797896 |
| HLA.DRB1  | 0.474617 | 0.64052294 | 1.12235184 |
| TNFRSF13B | 0.479907 | 0.64623238 | 1.18562766 |
| KIR3DL1   | 0.482274 | 0.6479893  | 1.08763539 |
| KLRF1     | 0.483841 | 0.64866596 | 1.05579116 |
| ITGAM     | 0.484996 | 0.64878851 | 1.15067627 |
| IFIH1     | 0.487849 | 0.651177   | 1.19095673 |
| IL15      | 0.494111 | 0.65809544 | 0.99043431 |
| IRF5      | 0.500886 | 0.66473557 | 1.24508135 |
| RUNX1     | 0.501276 | 0.66473557 | 1.24443165 |
| IKZF1     | 0.504179 | 0.6671349  | 1.08122741 |
| LACTB     | 0.507091 | 0.66953574 | 1.12421347 |
| HLA.DOB   | 0.523646 | 0.68990078 | 1.31224854 |
| CALML4    | 0.531688 | 0.69898638 | 1.02623384 |
| STAT3     | 0.536685 | 0.70403839 | 1.06416569 |
| C4BPA     | 0.548442 | 0.71791764 | 1.13857395 |
| BLNK      | 0.551223 | 0.7189473  | 1.14149219 |
| C6        | 0.553943 | 0.7189473  | 1.173026   |
| NFIL3     | 0.552816 | 0.7189473  | 1.10844562 |
| ZBTB16    | 0.553341 | 0.7189473  | 0.98897092 |
| CCL15     | 0.563694 | 0.72542899 | 1.02126035 |
| CX3CL1    | 0.563694 | 0.72542899 | 1.02102012 |

|          |          |            |            |
|----------|----------|------------|------------|
| GP1BB    | 0.562819 | 0.72542899 | 1.00555879 |
| IFI35    | 0.563215 | 0.72542899 | 1.28270996 |
| DEFB103A | 0.568237 | 0.72667625 | 0.99825116 |
| EOMES    | 0.567464 | 0.72667625 | 0.89731847 |
| LGALS3   | 0.567123 | 0.72667625 | 1.20090831 |
| HLA.DRB3 | 0.579526 | 0.7380185  | 0.91746943 |
| SERPING1 | 0.578631 | 0.7380185  | 0.84752451 |
| BST2     | 0.584731 | 0.74155075 | 0.9955756  |
| TGFBI    | 0.584731 | 0.74155075 | 0.90999782 |
| SYK      | 0.587865 | 0.74397853 | 0.99163273 |
| TCF4     | 0.598361 | 0.75569402 | 0.95334857 |
| MAF      | 0.603403 | 0.76048725 | 1.10522799 |
| PTPN2    | 0.607888 | 0.76142029 | 1.14269312 |
| PTPN22   | 0.607881 | 0.76142029 | 1.11340386 |
| TRAF6    | 0.607888 | 0.76142029 | 0.97447002 |
| LITAF    | 0.612142 | 0.7651775  | 0.9596249  |
| ATG10    | 0.622806 | 0.77375084 | 1.18880163 |
| CD7      | 0.621761 | 0.77375084 | 1.19495062 |
| CR2      | 0.622305 | 0.77375084 | 1.07204763 |
| LTA      | 0.628935 | 0.77977713 | 1.13401051 |
| LILRA4   | 0.635623 | 0.78647065 | 0.89674518 |
| S100A9   | 0.643367 | 0.79444103 | 1.08515866 |
| HLA.DQB1 | 0.646359 | 0.79652321 | 1.12634751 |
| ILF3     | 0.647726 | 0.79659851 | 1.02292048 |
| CFH      | 0.657738 | 0.80404846 | 0.85253738 |
| GPR183   | 0.657576 | 0.80404846 | 1.12008716 |
| IRF7     | 0.656479 | 0.80404846 | 1.01799862 |
| C5       | 0.661618 | 0.80717396 | 0.91560548 |
| C1QA     | 0.664184 | 0.80868711 | 1.02361437 |
| ICAM4    | 0.675353 | 0.82064807 | 0.92435504 |
| CD86     | 0.678564 | 0.82291062 | 1.18018743 |
| FADD     | 0.68175  | 0.82503285 | 0.90721852 |
| MAP4K4   | 0.683019 | 0.82503285 | 1.1516657  |
| CASP3    | 0.68748  | 0.82714556 | 1.00903177 |
| CTSC     | 0.686365 | 0.82714556 | 1.05312844 |
| BST1     | 0.691955 | 0.83089085 | 1.02081257 |
| IFI16    | 0.698686 | 0.83568325 | 0.98304134 |
| PTPN6    | 0.698686 | 0.83568325 | 0.9633485  |
| NOTCH2   | 0.700935 | 0.83673258 | 1.01019156 |
| C1QBP    | 0.703186 | 0.8377802  | 1.0741087  |
| FCGR1A.B | 0.708183 | 0.84208895 | 1.17109816 |
| ACTA2    | 0.715336 | 0.8479308  | 1.01648195 |
| PPARG    | 0.715876 | 0.8479308  | 0.92670496 |



|           |          |            |            |
|-----------|----------|------------|------------|
| CD59      | 0.725842 | 0.85806903 | 1.04673214 |
| KCNJ15    | 0.733824 | 0.86582716 | 1.23034166 |
| ARG1      | 0.764021 | 0.89971585 | 0.86905718 |
| FCGR2A    | 0.771861 | 0.90371441 | 0.97498383 |
| IKBKB     | 0.76948  | 0.90371441 | 1.07116186 |
| PTPRC_all | 0.771861 | 0.90371441 | 0.96544241 |
| IL1RL2    | 0.776761 | 0.90592567 | 1.02843534 |
| KIR3DL2   | 0.778205 | 0.90592567 | 1.02909338 |
| MRC1      | 0.777206 | 0.90592567 | 1.17974986 |
| APP       | 0.787    | 0.90713791 | 1.03746308 |
| IRF4      | 0.7835   | 0.90713791 | 1.03826556 |
| LCP2      | 0.785833 | 0.90713791 | 1.09603206 |
| LILRB5    | 0.781927 | 0.90713791 | 0.99227114 |
| MX1       | 0.788169 | 0.90713791 | 1.09320427 |
| PRDM1     | 0.788169 | 0.90713791 | 1.04931054 |
| PLA2G2E   | 0.800459 | 0.919548   | 1.00293577 |
| B3GAT1    | 0.807183 | 0.9203395  | 0.98248658 |
| CUL9      | 0.806889 | 0.9203395  | 1.19257914 |
| IKZF3     | 0.80457  | 0.9203395  | 0.91413174 |
| LOC389386 | 0.80457  | 0.9203395  | 0.97716494 |
| BATF2     | 0.809272 | 0.92099985 | 1.08594497 |
| STAT5A    | 0.817517 | 0.9286506  | 1.05717939 |
| GBP6      | 0.821601 | 0.93155504 | 0.89799605 |
| TBK1      | 0.823419 | 0.93188421 | 1.12946847 |
| CD8A      | 0.828149 | 0.93204961 | 0.968047   |
| CTLA4_all | 0.825783 | 0.93204961 | 1.11452424 |
| TNFSF4    | 0.826835 | 0.93204961 | 1.12303898 |
| PSMD7     | 0.832884 | 0.93393243 | 0.98874898 |
| TAPBP     | 0.832884 | 0.93393243 | 0.98977836 |
| PDGFRB    | 0.83849  | 0.9384593  | 0.97786716 |
| PTGER4    | 0.839998 | 0.9384593  | 1.06076472 |
| PSMB7     | 0.856647 | 0.95356692 | 1.00243227 |
| TNFRSF14  | 0.855455 | 0.95356692 | 1.02925253 |
| ITGAX     | 0.868579 | 0.96508778 | 1.04980553 |
| CD45RO    | 0.87336  | 0.96512609 | 1.02663383 |
| FCGR2A.C  | 0.870969 | 0.96512609 | 1.04707472 |
| ZEB1      | 0.872163 | 0.96512609 | 1.10315843 |
| IL18      | 0.890158 | 0.98191027 | 1.01696117 |
| GZMB      | 0.897333 | 0.98803814 | 0.98751913 |
| ITGB1     | 0.899735 | 0.98889793 | 1.02570048 |
| TAL1      | 0.902935 | 0.99063013 | 0.96736839 |
| CCL24     | 0.906946 | 0.99146427 | 1.16864602 |
| TNFRSF17  | 0.90635  | 0.99146427 | 1.01929115 |

|          |          |            |            |
|----------|----------|------------|------------|
| EGR1     | 0.911509 | 0.99447646 | 0.97408191 |
| KLRD1    | 0.912962 | 0.99447646 | 1.13724572 |
| BCL10    | 0.981834 | 1          | 0.99146668 |
| C1R      | 1        | 1          | 1          |
| C1S      | 1        | 1          | 1          |
| C7       | 1        | 1          | 1          |
| C8A      | 1        | 1          | 1          |
| C8B      | 1        | 1          | 1          |
| C9       | 1        | 1          | 1          |
| CCL11    | 1        | 1          | 1          |
| CCL16    | 1        | 1          | 1          |
| CCL26    | 1        | 1          | 1          |
| CCR8     | 1        | 1          | 1          |
| CCRL1    | 0.993459 | 1          | 0.9769923  |
| CD1A     | 1        | 1          | 1          |
| CD34     | 1        | 1          | 1          |
| CD48     | 0.946747 | 1          | 1.05431641 |
| CDH5     | 1        | 1          | 1          |
| CFI      | 1        | 1          | 1          |
| CLU      | 1        | 1          | 1          |
| CXCL12   | 0.976741 | 1          | 0.97463052 |
| DEFB103B | 1        | 1          | 1          |
| GBP1     | 0.950373 | 1          | 1.02038819 |
| HAMP     | 1        | 1          | 1          |
| HFE      | 1        | 1          | 1          |
| IFNA2    | 1        | 1          | 1          |
| IFNB1    | 1        | 1          | 1          |
| IFNGR1   | 0.929841 | 1          | 1.01551595 |
| IL17A    | 1        | 1          | 1          |
| IL17B    | 1        | 1          | 1          |
| IL18R1   | 0.956418 | 1          | 0.99622314 |
| IL21     | 1        | 1          | 1          |
| IL22RA2  | 1        | 1          | 1          |
| IL27     | 0.996179 | 1          | 1.05060234 |
| IL29     | 1        | 1          | 1          |
| IL2RB    | 0.952791 | 1          | 1.01714186 |
| IL3      | 0.993459 | 1          | 0.98962627 |
| IL5      | 1        | 1          | 1          |
| IL9      | 1        | 1          | 1          |
| IRAK4    | 0.956418 | 1          | 1.07324764 |
| ITGA5    | 0.943122 | 1          | 1.01115958 |
| ITLN2    | 1        | 1          | 1          |
| KIR3DL3  | 1        | 1          | 1          |

|          |          |   |            |
|----------|----------|---|------------|
| KLRAP1   | 0.951339 | 1 | 0.9944749  |
| MAPKAPK2 | 0.969727 | 1 | 1.06804727 |
| MASP1    | 1        | 1 | 1          |
| MBL2     | 1        | 1 | 1          |
| MUC1     | 1        | 1 | 1.03402667 |
| MYD88    | 0.996366 | 1 | 0.99793393 |
| NOS2     | 0.993459 | 1 | 0.97639668 |
| TLR7     | 0.979226 | 1 | 1.01148386 |
| TNFSF11  | 1        | 1 | 1.01017007 |

**Supplementary Table 7.** Comparison between Null and IL-1b-induced genes, showing p-value, q-value and fold change.

| Gene    | Pre-Tx (V1) |          |             | Post-Tx (V2) |         |             |
|---------|-------------|----------|-------------|--------------|---------|-------------|
|         | p-value     | q-value  | Fold change | p-value      | q-value | Fold change |
| RELB    | 8.61E-12    | 9.21E-10 | 4.89        | 0.0768       | 0.29    | 1.34        |
| ICAM1   | 1.11E-10    | 1.98E-09 | 6.52        | 0.0719       | 0.29    | 1.56        |
| IRAK3   | 1.11E-10    | 1.98E-09 | 6.58        | 0.0282       | 0.29    | 1.68        |
| NFKB2   | 8.59E-11    | 1.98E-09 | 4.06        | 0.0548       | 0.29    | 1.52        |
| NFKBIA  | 1.11E-10    | 1.98E-09 | 5.83        | 0.0383       | 0.29    | 1.57        |
| TNFAIP3 | 3.84E-11    | 1.98E-09 | 5.52        | 0.0241       | 0.29    | 1.58        |
| NFKB1   | 1.82E-10    | 2.79E-09 | 3.84        | 0.0819       | 0.29    | 1.53        |
| ATG7    | 2.32E-10    | 3.11E-09 | 4.74        | 0.0719       | 0.29    | 1.47        |
| CLEC5A  | 4.66E-10    | 5.54E-09 | 8.31        | 0.0930       | 0.29    | 1.72        |
| CDKN1A  | 5.83E-10    | 6.24E-09 | 8.82        | 0.0629       | 0.29    | 1.88        |
| BCL3    | 1.12E-09    | 9.21E-09 | 5.82        | 0.1957       | 0.45    | 1.26        |
| CCRL2   | 1.12E-09    | 9.21E-09 | 10.45       | 0.0305       | 0.29    | 2.41        |
| IL8     | 1.12E-09    | 9.21E-09 | 9.53        | 0.0261       | 0.29    | 2.24        |
| NFKBIZ  | 1.38E-09    | 1.06E-08 | 4.79        | 0.0548       | 0.29    | 1.53        |
| SRC     | 2.55E-09    | 1.82E-08 | 4.62        | 0.0873       | 0.29    | 1.61        |
| TICAM1  | 4.58E-09    | 3.06E-08 | 4.21        | 0.2060       | 0.45    | 1.42        |
| BATF    | 5.54E-09    | 3.29E-08 | 2.50        | 0.6751       | 0.87    | 0.99        |
| IL1RN   | 5.54E-09    | 3.29E-08 | 9.93        | 0.0873       | 0.29    | 2.40        |
| IRAK2   | 6.68E-09    | 3.57E-08 | 9.63        | 0.0412       | 0.29    | 2.30        |
| JAK3    | 6.68E-09    | 3.57E-08 | 2.42        | 1.0000       | 1.00    | 1.02        |
| CTSS    | 9.65E-09    | 4.49E-08 | 3.33        | 0.5340       | 0.78    | 1.17        |
| PTGS2   | 9.65E-09    | 4.49E-08 | 18.16       | 0.0768       | 0.29    | 3.38        |
| TNFAIP6 | 9.65E-09    | 4.49E-08 | 5.42        | 0.0511       | 0.29    | 1.83        |
| CXCL2   | 1.38E-08    | 6.17E-08 | 12.59       | 0.0412       | 0.29    | 2.29        |
| MARCO   | 2.54E-08    | 1.09E-07 | 20.91       | 0.4004       | 0.70    | 1.46        |
| BID     | 2.77E-08    | 1.14E-07 | 2.99        | 0.2591       | 0.52    | 1.75        |
| CCL20   | 3.27E-08    | 1.30E-07 | 13.80       | 0.0930       | 0.29    | 2.11        |
| PLAU    | 4.56E-08    | 1.68E-07 | 24.71       | 0.0099       | 0.29    | 6.23        |
| SOCS3   | 4.56E-08    | 1.68E-07 | 3.98        | 0.2765       | 0.55    | 1.36        |
| TRAF1   | 5.37E-08    | 1.91E-07 | 3.27        | 0.0873       | 0.29    | 1.41        |
| CXCL1   | 7.40E-08    | 2.55E-07 | 5.37        | 0.0930       | 0.29    | 1.70        |
| CD14    | 1.86E-07    | 6.23E-07 | 3.02        | 0.2514       | 0.52    | 1.17        |
| TNF     | 2.89E-07    | 9.39E-07 | 3.22        | 0.0673       | 0.29    | 1.57        |
| CD46    | 5.11E-07    | 1.61E-06 | 2.79        | 0.9424       | 0.98    | 1.04        |
| CASP8   | 5.88E-07    | 1.80E-06 | 2.23        | 0.9654       | 0.98    | 1.01        |
| CD83    | 6.74E-07    | 1.95E-06 | 4.23        | 0.0819       | 0.29    | 1.70        |
| POU2F2  | 6.74E-07    | 1.95E-06 | 2.46        | 0.3314       | 0.62    | 1.26        |
| KCNJ2   | 8.85E-07    | 2.43E-06 | 3.93        | 0.1333       | 0.35    | 1.74        |
| TNFSF15 | 8.85E-07    | 2.43E-06 | 12.98       | 0.0511       | 0.29    | 2.63        |
| CSF3R   | 2.50E-06    | 6.69E-06 | 3.60        | 0.6751       | 0.87    | 0.92        |
| IL1B    | 3.63E-06    | 9.46E-06 | 5.83        | 0.1333       | 0.35    | 1.81        |

|         |          |          |       |        |      |      |
|---------|----------|----------|-------|--------|------|------|
| CCL3    | 4.62E-06 | 1.18E-05 | 6.01  | 0.0511 | 0.29 | 2.26 |
| FCER1A  | 4.93E-06 | 1.23E-05 | 0.09  | 0.5102 | 0.78 | 1.80 |
| SLAMF7  | 5.21E-06 | 1.27E-05 | 3.80  | 0.1258 | 0.35 | 1.81 |
| LILRB4  | 5.87E-06 | 1.39E-05 | 2.64  | 0.3462 | 0.63 | 1.30 |
| CD274   | 6.60E-06 | 1.50E-05 | 5.95  | 0.0816 | 0.29 | 4.00 |
| FER1L3  | 6.60E-06 | 1.50E-05 | 4.14  | 0.8060 | 0.95 | 0.75 |
| S1PR1   | 9.34E-06 | 2.08E-05 | 0.34  | 0.7837 | 0.93 | 1.19 |
| CD36    | 1.17E-05 | 2.51E-05 | 2.98  | 0.2514 | 0.52 | 1.34 |
| CXCR2   | 1.17E-05 | 2.51E-05 | 3.61  | 0.6751 | 0.87 | 0.92 |
| CD244   | 2.81E-05 | 5.89E-05 | 1.93  | 0.9424 | 0.98 | 1.10 |
| ICAM5   | 3.93E-05 | 8.09E-05 | 12.63 | 0.0149 | 0.29 | 3.74 |
| C3      | 4.71E-05 | 9.52E-05 | 4.26  | 0.4648 | 0.75 | 1.35 |
| IL16    | 7.03E-05 | 0.0001   | 1.93  | 0.8738 | 0.97 | 0.98 |
| CCL7    | 0.0001   | 0.0002   | 2.68  | 0.6268 | 0.86 | 1.47 |
| CD40    | 0.0002   | 0.0003   | 1.75  | 0.1186 | 0.33 | 1.26 |
| CCND3   | 0.0002   | 0.0004   | 2.16  | 0.8151 | 0.95 | 0.94 |
| NFATC3  | 0.0002   | 0.0004   | 1.67  | 0.7837 | 0.93 | 1.02 |
| CYBB    | 0.0002   | 0.0004   | 1.58  | 0.9195 | 0.98 | 1.02 |
| IKBKE   | 0.0002   | 0.0004   | 1.56  | 0.5532 | 0.80 | 1.13 |
| IL6     | 0.0003   | 0.0006   | 4.94  | 0.0378 | 0.29 | 3.96 |
| CCL4    | 0.0004   | 0.0008   | 3.22  | 0.0383 | 0.29 | 2.15 |
| IFIT2   | 0.0007   | 0.0011   | 3.28  | 0.9650 | 0.98 | 1.32 |
| CASP2   | 0.0010   | 0.0017   | 1.59  | 0.8966 | 0.97 | 1.01 |
| IL7R    | 0.0013   | 0.0021   | 1.46  | 0.5340 | 0.78 | 1.13 |
| IL1A    | 0.0016   | 0.0026   | 3.41  | 0.1186 | 0.33 | 2.50 |
| LILRB1  | 0.0023   | 0.0036   | 1.69  | 0.1118 | 0.33 | 1.70 |
| CCL19   | 0.0028   | 0.0044   | 0.24  | 0.2195 | 0.47 | 1.62 |
| LAIR1   | 0.0032   | 0.0050   | 1.51  | 0.8966 | 0.97 | 0.95 |
| SELE    | 0.0035   | 0.0053   | 2.58  | 0.1408 | 0.35 | 1.49 |
| SELL    | 0.0046   | 0.0069   | 1.66  | 0.7616 | 0.93 | 0.86 |
| KLF2    | 0.0060   | 0.0089   | 1.68  | 0.6334 | 0.86 | 0.92 |
| CXCL13  | 0.0106   | 0.0155   | 0.36  | 0.4326 | 0.74 | 1.67 |
| IL2RA   | 0.0135   | 0.0193   | 1.55  | 0.0871 | 0.29 | 2.76 |
| ITGA4   | 0.0133   | 0.0193   | 1.38  | 0.5728 | 0.81 | 1.34 |
| CD80    | 0.0216   | 0.0304   | 0.42  | 0.1483 | 0.36 | 1.84 |
| IL23A   | 0.0220   | 0.0306   | 2.50  | 0.6928 | 0.87 | 2.00 |
| TNFSF12 | 0.0262   | 0.0359   | 1.48  | 0.3462 | 0.63 | 0.91 |
| LILRA3  | 0.0276   | 0.0374   | 1.57  | 0.8285 | 0.95 | 1.18 |
| LILRA1  | 0.0280   | 0.0375   | 0.31  | 0.4646 | 0.75 | 0.62 |
| CCL23   | 0.0344   | 0.0455   | 0.42  | 0.3250 | 0.62 | 1.50 |
| CD40LG  | 0.0396   | 0.0517   | 1.48  | 0.6964 | 0.87 | 1.26 |
| ADA     | 0.0437   | 0.0557   | 1.30  | 0.9885 | 1.00 | 0.93 |
| IDO1    | 0.0437   | 0.0557   | 1.34  | 0.1118 | 0.33 | 1.73 |

|              |        |        |      |        |      |      |
|--------------|--------|--------|------|--------|------|------|
| AHR          | 0.0482 | 0.0607 | 1.28 | 0.5151 | 0.78 | 1.17 |
| DUSP4        | 0.0505 | 0.0628 | 3.28 | 0.0299 | 0.29 | 3.63 |
| PDCD1LG<br>2 | 0.1326 | 0.1630 | 2.27 | 0.5709 | 0.81 | 1.59 |
| CCL22        | 0.1470 | 0.1729 | 0.94 | 0.6541 | 0.87 | 1.44 |
| CD1D         | 0.1462 | 0.1729 | 0.41 | 0.6253 | 0.86 | 0.76 |
| IL10         | 0.1470 | 0.1729 | 1.76 | 0.5193 | 0.78 | 1.23 |
| SIGIRR       | 0.1426 | 0.1729 | 0.88 | 0.4604 | 0.75 | 0.87 |
| HLA.DMB      | 0.1615 | 0.1878 | 1.23 | 0.7837 | 0.93 | 1.15 |
| CCL2         | 0.1660 | 0.1889 | 0.65 | 0.4965 | 0.78 | 1.59 |
| PYCARD       | 0.1643 | 0.1889 | 0.87 | 0.8491 | 0.97 | 0.86 |
| ALDH1A1      | 0.1770 | 0.1993 | 1.51 | 0.8951 | 0.97 | 0.95 |
| HLA.DMA      | 0.2209 | 0.2462 | 1.35 | 0.8738 | 0.97 | 0.94 |
| CCR2         | 0.2419 | 0.2668 | 0.46 | 0.2060 | 0.45 | 0.81 |
| SELPLG       | 0.3421 | 0.3735 | 0.60 | 0.3570 | 0.64 | 0.66 |
| TNFRSF9      | 0.4347 | 0.4698 | 1.29 | 0.1360 | 0.35 | 2.14 |
| LAMP3        | 0.4412 | 0.4721 | 0.44 | 0.0930 | 0.29 | 2.19 |
| BATF3        | 0.4652 | 0.4928 | 1.06 | 0.4384 | 0.74 | 1.59 |
| CISH         | 0.4988 | 0.5233 | 1.48 | 0.1543 | 0.36 | 2.55 |
| EBI3         | 0.6138 | 0.6376 | 1.38 | 0.3287 | 0.62 | 1.83 |
| MSR1         | 0.6240 | 0.6420 | 0.87 | 0.4733 | 0.76 | 1.50 |
| GAS6         | 0.6462 | 0.6585 | 1.02 | 0.9509 | 0.98 | 0.97 |
| TNFRSF4      | 0.9430 | 0.9519 | 1.03 | 0.1558 | 0.36 | 1.93 |
| CYB561       | 0.9601 | 0.9601 | 0.82 | 0.6823 | 0.87 | 1.10 |

**Supplementary Table 8.** List of differentially expressed genes between LTBI and TB that are induced by IL-1b, with their respective p and q values, as well as fold-change.
